## Title page

# The characteristics of the HIV-1 Env glycoprotein contribute to viral pathogenesis

**Silvia Pérez-Yanes<sup>1</sup>, Maria Pernas<sup>2,#</sup>, Silvia Marfil<sup>3,#</sup>, Romina Cabrera-Rodríguez<sup>1</sup>, Raquel Ortiz<sup>3</sup>, Carla Roviroso<sup>3</sup>, Judith Estévez-Herrera<sup>1</sup>, Isabel Olivares<sup>2</sup>, Concepción Casado<sup>2,\*</sup>, Cecilio Lopez-Galindez<sup>2,\*</sup>, Julià Blanco<sup>3,4,\*</sup> and Agustin Valenzuela-Fernández<sup>1,\*</sup>**

<sup>1</sup>Laboratorio de Inmunología Celular y Viral, Unidad de Farmacología, Sección de Medicina, Facultad de Ciencias de la Salud de la Universidad de La Laguna (ULL), Campus de Ofra s/n, 38071 Tenerife, Spain.  
([sperezya@ull.edu.es](mailto:sperezya@ull.edu.es)), ([rcabrerr@ull.edu.es](mailto:rcabrerr@ull.edu.es)), ([jesteveh@ull.edu.es](mailto:jesteveh@ull.edu.es)), ([avalenzu@ull.edu.es](mailto:avalenzu@ull.edu.es))

<sup>2</sup>Unidad de Virología Molecular, Laboratorio de Referencia e Investigación en Retrovirus. Centro Nacional de Microbiología. Instituto de Salud Carlos III. Majadahonda 28220 Madrid. Spain.  
([ccasado@isciii.es](mailto:ccasado@isciii.es)), ([mpernas@isciii.es](mailto:mpernas@isciii.es)), ([iolivar@isciii.es](mailto:iolivar@isciii.es)), ([ceciliolopezgalindez1462@gmail.com](mailto:ceciliolopezgalindez1462@gmail.com))

<sup>3</sup>Institut de Recerca de la Sida IrsiCaixa, Institut d'Investigació en Ciències de la Salut Germans Trias i Pujol (IGTP), 08916 Badalona, Spain.

<sup>4</sup>Universitat de Vic, Universitat Central de Catalunya, UVIC-UCC, 08500 Vic, Spain.  
([smarfil@irsicaixa.es](mailto:smarfil@irsicaixa.es)), ([rortiz@irsicaixa.es](mailto:rortiz@irsicaixa.es)), ([croviroso@irsicaixa.es](mailto:croviroso@irsicaixa.es)), ([jblanco@irsicaixa.es](mailto:jblanco@irsicaixa.es))

#These authors contributed equally.

\*Corresponding authors.

E-mail address for correspondece: [avalenzu@ull.edu.es](mailto:avalenzu@ull.edu.es)

## 1 **Abstract**

2 The understanding of HIV-1 pathogenesis and clinical progression is incomplete  
3 because of the variable contribution of host, immune and viral factors. The  
4 involvement of viral factors has been investigated in extreme clinical phenotypes  
5 from rapid progressors to long-term non-progressors (LTNPs). Among HIV-1  
6 proteins, the envelope glycoprotein complex (Env) has concentrated many  
7 studies for its important role in the immune response and in the first steps of viral  
8 replication. In this study, we analyzed the contribution of 41 Envs from 24 patients  
9 with different clinical progression rates and viral loads (VLs), LTNP-Elite  
10 Controllers (LTNP-ECs); Viremic LTNPs (vLTNPs), and non-controller's  
11 individuals contemporary to LTNPs or recent, named Old and Modern  
12 progressors. We analyzed the Env expression, the fusion and cell-to-cell transfer  
13 capacities as well as viral infectivity. The sequence and phylogenetic analysis of  
14 Envs were also performed. In every functional characteristic, the Envs from  
15 subjects with viral control (LTNP-ECs and vLTNPs) showed significant lower  
16 performance compared to those from the progressor individuals (Old and  
17 Modern). Regarding sequence analysis, the variable loops of the gp120 subunit  
18 of the Env (i.e., V2, V4 and mainly V5) of the progressor individuals showed  
19 longer and more glycosylated sequences than controller subjects. Therefore,  
20 HIV-1 Envs presenting poor viral functions and shorter sequences were  
21 associated with viremic control and the non-progressor clinical phenotype,  
22 whereas functional Envs were associated with the lack of virological control and  
23 progressor clinical phenotypes. These correlations support the central role of Env  
24 genotypic and phenotypic characteristics in the *in vivo* HIV-1 infection and  
25 pathogenesis.

26 **Words: 250**

27 **IMPORTANCE**

28 The role of the virus in the pathogenesis of HIV-1 infection has not been  
29 investigated in isolates from individuals with different progression rates. In this  
30 work, we studied the properties of the envelope glycoprotein complex (Env) in  
31 individuals with different progression rates to elucidate its role in pathogenesis.  
32 We estimated the Env expression, the CD4 binding, the fusion and cell-to-cell  
33 viral transfer capacities that affect the infectivity of the viral Envs in recombinant  
34 viruses. The Envs from individuals which control viral replication and lack  
35 clinical progression (LTNP-ECs and vLTNPs) showed lower functional capacities  
36 than from subjects with clinical progression (Old and Modern). The functional  
37 increase of the Envs characteristics was associated with an increase in viral  
38 infectivity and in increased length of variable loops and the number of  
39 glycosylation sites of the Env (gp120/SU). These results support the concept  
40 that viral characteristics contribute to viral infection and pathogenesis.

41 **Words: 148**

42

43

44

45

46

47

48

49

50

## 51 **Introduction**

52 Pathogenesis of viral infections is the result of complex interactions between  
53 host genetics, immune responses and viral factors. In human immunodeficiency  
54 virus type 1 (HIV-1) infection and pathogenesis, the role of host (1-6), immune (6-  
55 15) and viral factors (16-20) has been widely investigated. The interactions of  
56 these factors have been primarily studied in extreme clinical phenotypes like  
57 rapid progressors (RPs) (21, 22) or long-term non-progressors (LTNPs), LTNP-  
58 Elite Controllers (LTNP-ECs), HIV controllers or Elite suppressors (ES) (17-19,  
59 23, 24).

60 Due to these entangled interactions, the investigation of the role of viral proteins  
61 and their specific properties in HIV-1 pathogenesis is challenging. Among the  
62 viral proteins, the envelope glycoprotein complex (Env) has attracted numerous  
63 studies because its essential role in the immune response and in the initial  
64 events of the HIV-1 biological cycle (25-29), i.e the binding to the cellular  
65 receptors (29-42). The binding efficiency of the viral Env to the CD4 receptor  
66 determines further steps of the viral cycle: virus-cell signaling, fusion and cell-to-  
67 cell virus transfer capabilities (18, 19, 43). HIV-1 Envs unable to stabilize  
68 microtubules (i.e., increasing post-transductional acetylation of Lys<sup>40</sup> residue in  
69  $\alpha$ -tubulin), to reorganize F-actin for the delineation of pseudopod-entry virus hot  
70 zones present low CD4 binding, restricted fusion and low early infection (18, 19,  
71 43-45).

72 There are few reports investigating the characteristics of viral Envs from HIV  
73 individuals with different clinical characteristics. Lassen *et al.* studied the entry  
74 efficiency of viral Envs from ES individuals relative to chronically infected  
75 viremic and chronic progressors. Envs from ES showed decreased entry  
76 efficacy and slower entry kinetics than those of chronic progressors (20). Our



77 group studied the CD4 binding, signaling capacity, fusogenicity of viral Envs  
78 from viremic non-progressors (VNPs) that were similar to those of progressors  
79 individuals (19). In previous reports, deficient viral Env glycoproteins, because  
80 of poor CD4 binding, low transfer and signaling capacity (18) were identified in a  
81 cluster of poor replicating viruses from a group of LTNP-ECs without clinical  
82 progression for more than 20 years (17, 18). Thus, these works have established  
83 that viral Env play an important role in the pathogenesis control in LTNPs (17-  
84 20, 46, 47).

85 To further investigate the role of viral Env in HIV-1 infection and pathogenesis,  
86 in this work, we expanded our previous studies to viral Envs from other sets of  
87 LTNP-ECs and Viremic LTNPs (vLTNPs) in comparison with groups of chronic  
88 progressors. Clonal full-length *env* genes derived from viruses of individuals in  
89 these distinct clinical groups were analyzed for expression, CD4 dependent-  
90 Env-mediated fusion, cell-to-cell viral transfer and infection efficiency. This  
91 analysis permitted the establishment of a relationship between the initial events  
92 of the viral replication cycle, mediated by the viral Env characteristics, with the  
93 VL control and the clinical outcome and pathogenesis of the HIV-1 infection.

94

95

## 96 **Results**

### 97 **Analysis of the characteristics of viral envelopes of viruses from different** 98 **risk groups.**

99 For the investigation of the potential role of the HIV-1 Env in virological control  
100 and pathogenesis, we studied the phenotypic characteristics of 41 Envs from 24  
101 individuals without antiviral therapy and different VLs (**Table 1**). We analyzed 10  
102 Envs from 6 LTNP-EC individuals with undetectable VL and infected in the late  
103 80's and 90's; 10 viral clones from 6 Viremic LTNPs (vLTNPs) with VL <10,000  
104 viral copies/mL and infected in the 90's. To ascertain that the characteristics of  
105 the Envs from these LTNPs were not due to the sampling time, we compared  
106 them with 10 Envs obtained from 6 HIV-1 individuals also infected in the same  
107 period (90's), but with high VL >10<sup>5</sup> viral copies/mL and chronic infection; these  
108 Env were designated Old. Finally, we studied 11 viral clones from 6 chronic  
109 individuals infected between 2013-2014 with VL >10<sup>4</sup> viral copies/mL and named  
110 Modern. The main characteristics of the participants are summarized in **Table**  
111 **1**.

112 We first analyzed the potential differences in the expression between the Env  
113 clones from the clinical groups, by measuring their cell-surface expression  
114 levels in HEK-293T cells (**Figure 1A**, *shows study scheme*, and **Figure 2**).

115 Although we observed a progressive augmentation of Env expression in viral  
116 clones derived from patients that do not control viremia (i.e., Old and Modern  
117 patients) compared to LTNPs (EC and Viremic), this increase did not reach  
118 statistical significance (**Figure 2**). Thus, the expression capability of the viral  
119 Envs appears to not contribute to the differences in VL and pathogenesis  
120 between groups.

121

122 **Analysis of cell-to-cell membrane fusion and viral transfer capacity of viral**  
123 **envelopes.**

124 A key process for HIV Env-mediated infection is the interaction of the Env  
125 complex with the CD4 receptor. When this interaction is functionally efficient,  
126 viral transfer through synaptic contacts or fusion pore formation are triggered  
127 during cell-to-cell or virus-to-cell contacts, respectively (18, 19, 43, 45, 48). We  
128 examined the viral Env/CD4 interaction and the efficiency of subsequent  
129 functions, measuring the membrane fusion capacity of the Envs (Figure 1B,  
130 *shows study scheme*) in co-cultures between Env-expressing HEK-293T and  
131 HIV-permissive target TZM-bl cells (Figure 3). To fully characterize our  
132 experimental models, we used the Envs from reference HIV-1<sub>BaL</sub> (CCR5-tropic)  
133 and HIV-1<sub>NL4.3</sub> (CXCR4-tropic) viruses (Figure 3 and 4). This fusion assay  
134 yielded lower fusion values for Envs of viruses from LTNP-ECs and from  
135 vLTNPs than for Old and Modern progressors, and attaining statistical  
136 significance between LTNPs (EC and Viremic) and Modern Envs glycoproteins  
137 (Figure 3B).

138 Next, we assayed the CD4-dependent cell-to-cell virus transfer capacity of the  
139 viral envelopes. This experiment was performed co-culturing Env-expressing  
140 HEK-293T cells with unstimulated primary CD4<sup>+</sup> T lymphocytes as target cells  
141 (Figure 1C, *shows study scheme, and Materials and methods*). In this assay,  
142 we forced the formation of virological synapses between virus-effector HEK-  
143 293T cells expressing the different Envs together with the structural HIV Gag  
144 polyprotein, and fresh primary CD4<sup>+</sup> T cells from healthy donors (Figure 1C,  
145 *shows study scheme*). The Envs from the LTNPs (EC and Viremic) individuals  
146 displayed a lower ability to transfer viral particles to primary CD4<sup>+</sup> T  
147 lymphocytes than Envs from Old individuals and significantly lower than from

148 Modern participants ( $p < 0.0022$  between all groups) (**Figure 4**). These data  
149 suggest that the Envs from LTNP-EC viruses had an impaired binding to the  
150 cell-surface CD4 receptor and that this impairment was progressively overcome  
151 in the Envs from individuals from the other groups with less control of viral  
152 replication, and higher VL.  
153 Thus, the phenotypic characterization of the Envs of viruses from subjects with  
154 distinct progression rates confirmed that LTNP-ECs and vLTNPs presented  
155 viruses with an impaired Env CD4-associated functions and a significant lower  
156 fusogenic and transfer capacity, in comparison with viruses from the viremic  
157 groups: These lower characteristics were also linked with the low VL detected in  
158 these subjects (**Figures 3 and 4**). We also observed a functional improvement  
159 in the viral Envs from the LTNP-EC and vLTNP individuals to those of chronic  
160 Modern glycoproteins: These data support that the deficient Env fusion and  
161 transfer capacities observed in the Envs of viruses from LTNP-EC and vLTNP  
162 phenotypes have been enhanced in the viruses from individuals with  
163 progressive infection, particularly in those of the Modern group.

164

#### 165 **Infectivity of recombinant viruses with the analyzed envelopes.**

166 For the exploration of the potential consequences of these Env properties in  
167 virus biology, we estimated the infectivity of recombinant viruses bearing the  
168 Env from the different HIV+ phenotypic groups in TZM-bl cells (**Figure 5 and**  
169 **Figure 1D**, *shows study scheme*). Viral Envs from the LTNP-EC group showed  
170 the lowest infectivity values, whereas the Modern Envs produced the higher  
171 titers. The viruses from vLTNPs displayed higher titers than LTNP-ECs but  
172 lower than those from Old individuals. Recombinant viruses from individuals  
173 with high VL and progressive infection (Old and Modern) have higher infectivity

174 rates than those with viral control (EC and Viremic). These results explain why  
175 the viral properties analyzed (binding, fusion and transfer) have a significant  
176 impact in viral infectivity with an important effect in the biology of HIV-1 and viral  
177 pathogenesis.

178

### 179 **Correlation between viral characteristics of the envelopes.**

180 A significant correlation was observed between the HIV-1 Env-triggered cell-to-  
181 cell transfer data, which is directly mediated by Env/CD4 binding, with Env-  
182 mediated infectivity and fusogenicity (**Figure 6**). In all viral characteristics, the  
183 Envs from subjects with virological control (EC and Viremic) showed the lower  
184 values, whereas those from the non-controlling individuals (Old and Modern)  
185 had the higher values. Therefore, HIV-1 Envs displaying poor viral functions,  
186 because of the poor binding of the viral Env to the CD4, correlated with viremic  
187 control and non-progressor clinical phenotypes. In contrast, functional Envs are  
188 associated with the lack of viremic control and the progressor clinical  
189 phenotypes. These statistical correlations support the role of viral properties in  
190 the viral phenotype that contributes to HIV-1 infection, disease progression and  
191 pathogenesis.

192

### 193 **Analysis of the viral envelope sequences.**

194 For the search of potential mechanisms involved in the changes of the  
195 characteristics among the different Envs sets, we analyzed the Env amino-acid  
196 (aa) sequences that could be associated with the distinct clinical phenotypes.  
197 Initially, we performed a phylogenetic reconstruction from *env* aa sequences  
198 together with other aa sequences obtained from HIV-1 Spanish individuals. All  
199 aa sequences analyzed correspond to HIV-1 subtype B. This analysis did not

200 reveal phylogenetic relationships between the different groups analysed and no  
201 clustering except for those aa sequences obtained from the same individual  
202 (**Figure 7**). Envs from LTNP-ECs and one vLTNPs grouped in short branches,  
203 as a consequence of the viral and evolutionary control, whereas long branch  
204 length was observed in the sequences obtained from non-controller patients  
205 (Old and Modern), because of the higher replication and viral evolution in these  
206 individuals.

207 We then carried out a comprehensive study of the protein sequences focusing  
208 in the variable loops and their associated potential N-linked glycosylation sites  
209 (PNGs) in the gp120 subunit of the Env. In general, as previously reported,  
210 there is a trend in the HIV-1 viral Env to gain length and glycosylation sites  
211 along the epidemic ([49-51](#)). This increasing trend is also found in our work  
212 where viruses from the LTNPs (EC, Viremic) and Old Envs isolated in the 90's  
213 showed shorter lengths than those of the Modern group obtained in 2013-2014  
214 (**Table 2**). The V3 loop was the most conserved and constant region in length  
215 and glycosylation sites (**Table 2 and Figure 8**), while the other loops showed  
216 length increases predominantly in the V2 and V5 loops that were reproduced in  
217 the total length (**Table 2 and Figure 8**). The only statistical differences were  
218 noticed between the total length in the LTNPs (EC and Viremic) versus Old and  
219 Modern Envs in the V2 and V5 regions (**Figure 8**).

220 Regarding the PNGS in the sequences, many of the 24 relevant sites previously  
221 described ([52-55](#)) were present in these set of viral glycoproteins. However,  
222 major differences were observed in the aa extension of the loops with a  
223 progressive acquisition of more PNGS in the Modern Envs (**Table 2**). Glycan at  
224 N289 site was more present in LTNP-ECs, vLTNPs and Old viruses but is not  
225 present in Modern ones. Position N362 which is N proximal to the CD4 binding

226 “DPE” motif (positions 368-370HXB2 sequence) was conserved in LTNP-EC,  
227 Viremic and Old but was only present in two of the Modern Envs. It is interesting  
228 to highlight that changes also occurred in the viral transmembrane gp41 protein  
229 in glycan N816 that was dominant in LTNPs but not in chronic individuals (Old  
230 and Modern).

231 It is interesting to mention that the trend in Env length increase follows the same  
232 pattern that the functional growth of the Env shown in the distinct viral  
233 characteristics (see **Figures 3 to 6**). We observed a good correlation between  
234 the genetic distance to the subtype B ancestor sequence obtained from Los  
235 Alamos National Laboratory HIV Database (LANL database,  
236 <http://www.hiv.lanl.gov>) and the functionality of viral Env proteins analysed  
237 (**Figure 9**). In general, the lower evolutionary sequences (less genetic distance  
238 to subtype B ancestor) are those with lower functionality (LTNP-ECs) and the  
239 higher evolutionary sequences are those with higher functionality (Moderns). In  
240 summary, the viral Envs with the most efficient characteristics are found within  
241 the Envs of the Modern group that also show the longer gp160 proteins, with  
242 more glycosylated sites and higher distance to the subtype B ancestor.

243

244

## 245 **Discussion**

246 HIV-1 infected individuals display a wide spectrum of clinical progression rates.  
247 The causes of this dispersion are multiple and associated with the operation of  
248 numerous combinations of host genetic, immunological and viral factors. In this  
249 work, we studied the potential contribution of viral Env glycoprotein  
250 characteristics to the clinical outcome of HIV-1 infection in HIV+ individuals with  
251 different clinical status.

252 The different groups of patients were defined by their clinical characteristics,  
253 distinct VLs and isolation dates because several studies have described a clear  
254 correlation between patients' VL and the likelihood of virus transmission,  
255 disease progression and pathogenesis (56-63).

256 Although viral control in HIV-1 individuals has been linked to the host-immune  
257 responses (10, 64), other researchers and our group, however, established, in  
258 previous works, a direct connection between deficiencies in HIV-1 Env-  
259 associated functions and long-term viremia control in LTNP-ECs (17, 18, 20).

260 The Envs from these LTNP-EC individuals were ineffective in the CD4 binding  
261 and in the subsequent functions: viral signaling, fusion and cell entry. These  
262 Env characteristics ensued in low replication and transmissibility of the virus  
263 (18, 19, 43, 45). All these data strongly support the role of the viral Env in the  
264 LTNP-EC phenotype and viral pathogenesis.

265 In the present work, we extended these observations to more Env from non-  
266 progressor subjects, which are not associated with a cluster of infection, in  
267 comparison to different sets of progressor chronic individuals. The Envs  
268 characteristics from LTNP individuals (EC and Viremic) were compared with  
269 those of individuals with progressive infection (Old and Modern). We



270 investigated the defects in the association of Envs with the CD4, membrane  
271 fusion impairment and the cell-to-cell virus transfer and viral infection capacities.  
272 Viral Envs from LTNPs showed the lower binding capacity to the CD4 receptor  
273 and this initial inefficient Env/CD4 interaction led to a deficiency in membrane  
274 fusion and virus cell-to-cell transfer capabilities. The properties of the Env from  
275 LTNPs were not due to the ancestral origin of the LTNPs viruses isolated in the  
276 late 80's and 90's, because the characteristics of the Old viruses which were  
277 contemporary to the LTNPs did not showed these limited functional  
278 characteristics. On the contrary, Envs from progressors (Old and Modern)  
279 presented efficient CD4-mediated viral functionality that triggered an effective  
280 membrane fusion and viral transfer. Thus, we disclosed that there is a clear  
281 correlation between the level of viral fusion, the transfer capacity of the viral Env  
282 and viral infectivity. The observed differences between the characteristics of the  
283 Envs from these groups could not be associated with viral tropism, because all  
284 the *env* nucleotide sequences from the studied viruses, showed an R5 tropism  
285 (Web PSSM, <https://indra.mullins.microbiol.washington.edu/webpssm/> ).  
286 In summary, viral Envs from LTNPs exhibited non-functional characteristics  
287 (**Figures 3-6**) in comparison with those from viruses of the progressive infection  
288 groups, supporting the concept that the properties of the Envs were associated  
289 with viral control and the clinical progression rate of the HIV-1 individuals.  
290 In spite of the limited sampling, because of the difficult and laborious viral  
291 characterization of the viral phenotypes, we observed statistically significant  
292 differences between the characteristics of the Envs of viruses from LTNP-ECs  
293 and the Moderns. Also, if we consider the Env characteristics from all clinical  
294 groups, there is a consistent and recurrent tendency, although with no statistical  
295 power in some cases, to gain functionality in the viral Envs from the LTNP

296 individuals (LTNP-ECs and vLTNPs), to those of the progressive groups (Old  
297 and Modern).

298 Remarkably, the increase in Env functionality also correlated with longer and  
299 more glycosylated proteins. The aa length and PNGs' profile of the Envs from  
300 the individuals of the distinct clinical groups showed that the studied Envs tend  
301 to increase length and glycosylation over the course of the epidemic as  
302 previously described (see [\(49, 51\)](#)). We observed that Env changes  
303 accumulated essentially in the V1, V2, V4 and V5 loops, as previously shown in  
304 works relating the role of V1 and V4 loops in the CD4 binding and neutralization  
305 [\(65-68\)](#) and viral cell-to-cell transfer capacity [\(50, 69, 70\)](#). Regarding specific  
306 changes detected in our study, the loss of the N362 PNGs (position in the HXB2  
307 isolate; group M, subtype B (HIV-1 M:B\_HXB2R: NCBI:txid11706)) which was  
308 prevalent in the EC, Viremic and Old but not in the Modern Envs groups could  
309 be associated with the gain of functionality in the Envs. However, the opposite  
310 effect with more efficient fusion and transfer capacity was found in Australian  
311 viruses with the N362 glycosylation site [\(55\)](#). The potential role of the other  
312 changes in PNGs detected in our study need to be further investigated. Besides  
313 these important changes, it is clear that point mutations could have a significant  
314 impact in the viral characteristics and HIV pathogenesis [\(71, 72\)](#). The variants  
315 of concern (VOCs) of the pandemic severe acute respiratory syndrome  
316 coronavirus (SARS-CoV-2) unfortunately are reminding us [\(73, 74\)](#). Thus, the  
317 contribution of the individual mutations deserves further studies but it is now out  
318 of the scope of the present work.

319 In contrast with the more significative changes detected in the V2 and V5 loops,  
320 it is important to point the stability in length and glycosylation of the V3 loop.  
321 This structure is key for viral tropism [\(75-79\)](#) and for the correct CD4 Env

322 binding as revealed with anti-V3 neutralizing antibodies that abrogate Env-CD4  
323 interaction (80, 81).

324 In this study, we confirmed the inefficient functionality of the Envs from LTNP-  
325 EC individuals previously described for a cluster of viruses (18, 20), but  
326 extended to HIV+ individuals controlling viremia which are not clustered by the  
327 same transmitted/founder (T/F) virus. Also, a gain of Envs functionality from  
328 those of the LTNP individuals to the chronic not controlling individuals was  
329 identified. This improvement was detected in every Env characteristic analyzed;  
330 expression, fusion, virus transfer and infectivity. Interestingly, this functional  
331 growth of viral Env was associated in this study with length and PNGs increases  
332 in the variable loops. This increase was also reported in studies analyzing the  
333 susceptibility, neutralization sensitivity, co-receptor binding, host range and viral  
334 phenotype (49). This increase in the V1-V2 length and PNGs has also been  
335 detected thorough chronic infections from early to late viral Env sampling like in  
336 our work (49). Likewise in a group of individuals infected with closely related  
337 viruses higher PNGs density has been observed in the V1-V5 region of the  
338 gp120 during chronic infection compared to those observed during the early  
339 acute infection phase (82). In viruses from the HIV-1 subtype B, it seems that  
340 early after viral transmission to a new host a selection for viral variants with  
341 shorter variable regions and a reduced degree of PNGs occurs (83). The growth  
342 in functionality of the viral characteristics was also correlated with the genetic  
343 distance of the sequences to the subtype B ancestor. Genetic variability in *env*  
344 gene has been is associated with an increase in viral infectivity and replication  
345 capacity (84-89). These changes could facilitate viral replication by increasing  
346 viral fitness that favors the escape from the immune response and anti-retroviral  
347 therapy (ART) failure (90-99).

348 The non-functional characteristics of the primary Envs of LTNP individuals (ECs  
349 and Viremics) resulted in poor viral replication and very limited evolution that  
350 could allow the efficient immune control of HIV-1 infection and pathogenesis. It  
351 has been reported that in a LTNP-EC patient that followed discontinued ART,  
352 the V1 domain of his HIV-1 strain that retained good infectivity and replicative  
353 capacity included two additional N-glycosylation sites and was placed in the top  
354 1% of lengths among the 6,112 Env sequences analyzed in the Los Alamos  
355 National Laboratory online database (100).

356 Therefore, it is conceivable that the functional characterization of the inefficient  
357 HIV-1 Envs could be significant in the development of a new generation of  
358 immunogens. Indeed, attenuated HIV or simian immunodeficiency virus (SIV)  
359 vaccines (LAHVs or LASVs) have been postulated as therapeutic vaccine  
360 strategies (101-107). However, further antigenic and immunogenicity work is  
361 needed to disclose the potential implications of these non-functional HIV Envs  
362 in the vaccine/cure field.

363

364 In summary, in this work, we exposed that the characteristics of the viral Envs  
365 from different groups of HIV-1 infected individuals could be associated with the  
366 short or long-term VL control and the clinical progression rate of the infection.  
367 The non-functional HIV-1 Envs could help in the development of new strategies  
368 for functional cure and virus eradication. Our data support the hypothesis that  
369 the functionality of viral Envs is a crucial characteristic for the control of viral  
370 infection, replication and pathogenesis.

371

372

## 373 **Material and methods**

### 374 **Viral envelopes.**

375 Forty-one viral envelopes (Envs) were obtained from samples of different  
376 origins: the HIV HGM BioBank integrated in the Spanish AIDS Research  
377 Network (RIS-RETIC, ISCIII) (samples 1,2,3,6,7,8,13,14,15,16,17,18,19), the  
378 Centro Sanitario Sandoval, Hospital Clínico San Carlos (samples  
379 21,22,24,28,30,31,32,33,36,37,38,39,40,42,43,44,45,46,49,50,51,52), the  
380 irsiCaixa Research Foundation (samples 9,10,11,12) and from Hospital Xeral  
381 de Vigo (samples 26,27). Samples were obtained in three different phases of  
382 the Spanish epidemic from 1993-94, 2004-2005 and 2013-2014. Samples were  
383 processed following current procedures and frozen immediately after their  
384 reception. All patients participating in the study gave their informed consent and  
385 protocols were approved by institutional ethical committees. Identification  
386 numbers and characteristics are found in [Table 1](#).

387

### 388 **Ethics Statement.**

389 Samples were obtained from participants who gave informed consent for  
390 genetic analysis studies and they were registered as sample collection in the  
391 Spanish National Registry of Biobanks for Biomedical Research with number  
392 C.0004030. The consents were approved by the Ethical and Investigation  
393 Committees of the “Centro Sanitario Sandoval” (Madrid) and the samples were  
394 encoded and de-identified in these Centers. All clinical investigations were  
395 conducted according to the principles expressed in the Declaration of Helsinki.  
396 The studies were approved by the Comité de Ética de la Investigación y de  
397 Bienestar Animal of the Instituto de Salud Carlos III with CEI PI 05\_2010-v3 and  
398 CEI PI 09-2013 numbers.

399 **Generation of *env* gene expression plasmids.**

400 The *env* genes were amplified at limiting dilution by nested PCR from proviral  
401 DNA. The products were cloned into the pcDNA3.1D/V5-His's Topo expression  
402 vector (Invitrogen) and NL4.3. The R5-tropic BaL.01-*env* (catalog number  
403 11445) glycoprotein plasmid was from the NIH AIDS Research and Reference  
404 Reagent Program. Ten viral Envs were derived from 6 LTNP-EC patients, 10  
405 clones from 6 Viremic LTNPs, 10 clones from 6 "Old" individuals (contemporary  
406 to LTNPs) and 11 clones from 10 recent "Modern" patients and NL4.3 and  
407 BaL.01 reference clones expression plasmids were transformed in DH5 $\alpha$  cells,  
408 and clones sequenced to check the correct insertion of the *env* gene.

409

410 **Env expression and fusion assays.**

411 The Env expression plasmids were used to transfect HEK-293T cells with X-  
412 tremeGENE HP DNA Transfection Reagent (Sigma) in combination with either  
413 a Tat expression plasmid pTat for Env expression and fusion assays, or with the  
414 *env* defective HIV-1 backbone pSG3 plasmid for viral transfer assays ([18](#), [19](#),  
415 [108](#)). As a negative control, HEK-293T cells were transfected only with pTat  
416 and as a positive control we use the BaL and NL4.3 Envs. HEK-293T cells were  
417 chosen as effector cells since they provide sensitive measures of fusion even  
418 when using low fusogenic Env. 24 hours post-transfection, cells were collected,  
419 and tested for Env surface expression and also fusion activity.

420 To test Env expression,  $1 \times 10^5$  Env/Tat co-transfected HEK-293T cells were  
421 incubated with 2G12 and IgGb12 monoclonal antibodies (mAbs; Polymun,  
422 Viena, Austria) at 6  $\mu\text{g}/\text{mL}$  each for 45 minutes at RT. After washing the cells,  
423 the PE-labeled goat anti-human IgG (Jackson ImmunoResearch Laboratories)  
424 was added and incubated in the dark at room temperature for 15 minutes, as

425 similarly reported (18, 19). Cells were washed, fixed in formaldehyde 1%,  
426 acquired in a Celesta flow cytometer (BD FACS Celesta) and analyzed using  
427 the Flow-Jo software (Tree Star Inc.) The percentage of Env-positive cells and  
428 the Mean Fluorescence Intensity (MFI) of these cells were used to evaluate Env  
429 expression.

430 To test fusion activity,  $1 \times 10^4$  Env/Tat-transfected or control Tat-transfected  
431 HEK-293T cells were mixed (ratio 1:1) in 96-well plates with  
432  $CD4^+CXCR4^+CCR5^+$  TZM-bl reporter cells for 6 hours at 37°C. Luciferase  
433 activity was measured (Fluoroskan Accent, Labsystems) using Brite-Lite  
434 (PerkinElmer) and normalized to BaL-Env-mediated fusion. NL4.3 and BaL-Env  
435 expression plasmids were used as positive controls for Env staining and as  
436 reference value for fusion activity (BaL = 100%), as similarly reported (19, 108)  
437 (summarized in the scheme of Figure 1B).

438

#### 439 **HIV-1 transfer/CD4 binding**

440 To test viral transfer activity, which exclusively depends on the binding of gp120  
441 to the CD4 molecule, Env expression plasmids were co-transfected with the  
442 Env-defective pSG3 plasmid in HEK-293T cells, as similarly reported (18, 19,  
443 108). One day after transfection,  $1 \times 10^5$  HEK-293T cells were mixed at a 1:1  
444 ratio in 96-well plates with primary  $CD4^+$  T lymphocytes freshly isolated from  
445 healthy donors by negative selection ( $CD4^+$  T-Cell Isolation Kit II, human,  
446 Miltenyi Biotec). Viral transfer was assessed after 24 hours of incubation at  
447 37°C in permeabilized (FIX & PERM Cell Permeabilization kit, Invitrogen Life  
448 Technologies) and stained cells with the anti-HIV-1 p24 KC57 mAb (anti HIV  
449 core antigen RD1 labelled, IZASA) for 20 minutes in the dark at RT. Then, the  
450 cells were washed and fixed in formaldehyde 1%, and acquired in a Celesta

451 flow cytometer (BD FACS Celesta) and the content of p24 in gated CD4+ T  
452 cells and gated HEK-293T cells was analyzed using the Flow-Jo software (Tree  
453 Star Inc.). The percentage of p24+ HEK-293T cells was used as a control for  
454 transfection efficiency and was similar among all experiments. Since co-  
455 receptor binding or fusion activity are not required for viral transfer, the  
456 frequency of p24+/CD4+ T cells was a direct measure of the amounts of HIV-1  
457 virions bound to or taken up by target cells (summarized in the scheme of  
458 **Figure 1C**).

459

#### 460 **Infectivity assay**

461 Cloned viral Envs were used to generate pseudoviruses by co-transfection with  
462 pSG3 plasmid of HEK-293T cells as indicated above and tested in TZM-bl cells  
463 to determine the infectivity capacity. Serial Dilutions of the pseudoviruses  
464 generated with the different Envs of the different groups of patients were made  
465 in a 96-well plate. Then,  $1 \times 10^5$  TZM-bl cells were added to the pseudoviruses  
466 with DEAE dextran hydrochloride (Sigma) at 18  $\mu\text{g}/\text{mL}$ . After 48 hours of  
467 incubation at 37°C, luciferase activity was measured (Fluoroskan Accent,  
468 Labsystems) using Brite-Lite (PerkinElmer). Uninfected TZM-bl cells were used  
469 as a negative control. The TCID<sub>50</sub> (Median Tissue Culture Infectious Dose)  
470 value was calculated with Montefiori template and normalized with the viral  
471 concentrations (summarized in the scheme of **Figure 1D**).

472

#### 473 **Phylogenetic Analysis.**

474 The evolutionary history was inferred by using the “maximum likelihood” (ML)  
475 method and JTT matrix-based model (109). The tree with the highest log  
476 likelihood (-49687,86) is shown. The percentage of trees in which the



477 associated taxa clustered together is shown next to the branches. Initial tree(s)  
478 for the heuristic search was(were) obtained automatically by applying Neighbor-  
479 Join and BioNJ algorithms to a matrix of pairwise distances estimated using the  
480 JTT model, and then selecting the topology with superior log likelihood value. A  
481 discrete Gamma distribution was used to model evolutionary rate differences  
482 among sites (5 categories (+G, parameter = 0,6825)). The rate variation model  
483 allowed for some sites to be evolutionarily invariable ([+I], 18,05% sites). The  
484 tree is drawn to scale, with branch lengths measured in the number of  
485 substitutions per site. This analysis involved 140 aa sequences. All positions  
486 with less than 95% site coverage were eliminated (i.e., fewer than 5% alignment  
487 gaps), and missing data and ambiguous bases were allowed at any position  
488 (partial deletion option). There were a total of 829 positions in the final dataset.  
489 Evolutionary analyses were conducted in MEGA X (110).

490 Nucleotide sequences have been deposited in GeneBank under the following  
491 numbers: KC595156, KC595162, KC595225, KC595227, KC 595189,  
492 MH605987, MH605986, KC595190, MH605988, MH605992, MH605991,  
493 MH605970, MH605971, KC595223, KC595222, MH605972, MH605975,  
494 MH605976, MH605978, MH605973, MH605979, MH605980, MH605981,  
495 MH605982, MH605983, MH605984, MK394184, MK394185.

496

#### 497 **Statistical analysis.**

498 Data and statistical analyses were performed using GraphPad Prism, version  
499 6.07 (GraphPad Software). Significance when comparing groups was  
500 determined with a nonparametric Kruskal-Wallis or by nonparametric Dunn's  
501 test for multiple comparisons. A nonparametric Spearman test was used to  
502 calculate correlations.

503 **Data Availability**

504 All “accession numbers” and “data” of this work are available.

505

506

507 **Acknowledgements**

508 We want to particularly acknowledge the patients in this study for their  
509 participation and to the HIV BioBank integrated in the Spanish AIDS Research  
510 Network and collaborating Centres ( [http://hivhgmbiobank.com/donor-](http://hivhgmbiobank.com/donor-area/hospitals-and-centres-transferring-samples/?lang=en)  
511 [area/hospitals-and-centres-transferring-samples/?lang=en](http://hivhgmbiobank.com/donor-area/hospitals-and-centres-transferring-samples/?lang=en) ) for the generous  
512 gifts of clinical samples used in this work. The HIV BioBank, integrated in the  
513 Spanish AIDS Research Network, is partially funded by the RD16/0025/0019  
514 project as part of the Plan Nacional R+D+I and cofinanced by ISCIII-  
515 Subdirección General de Evaluación and el Fondo Europeo de Desarrollo  
516 Regional (FEDER). The clinical follow-up of Drs. Carmen Rodriguez, Mar Vera  
517 and Jorge Del Romero (Centro Sanitario Sandoval), Eulalia Grau (Hospital  
518 Germans, Trias y Pujol; irsiCaixa, Badalona) is greatly appreciated.

519

520 **Funding**

521 This work is supported by Spanish AIDS network “Red Temática Cooperativa  
522 de Investigación en SIDA” RD12/0017/0002, RD12/0017/0028,  
523 RD12/0017/0034, RD16/0025/0011, RDCIII16/0002/0005 and RD16/0025/0041  
524 as part of the Plan Nacional R+D+I and cofunded by Spanish “Instituto de Salud  
525 Carlos III (ISCIII)-Subdirección General de Evaluación y el Fondo Europeo de  
526 Desarrollo Regional (FEDER)”. J.B. is a researcher from “Fundació Institut de  
527 Recerca en Ciències de la Salut Germans Trias i Pujol” supported by the Health  
528 Department of the Catalan Government/Generalitat de Catalunya and ISCIII  
529 grant numbers PI17/01318 and PI20/00093 (to JB). Work in CL-G’ and CC lab  
530 was supported by grants SAF (2010-17226) and (2016-77894-R) from MINECO  
531 (Spain) and FIS (PI 13/02269, ISCIII). A.V-F's Lab is supported by the  
532 European Regional Development Fund (ERDF), RTI2018-093747-B-100

533 (“Ministerio de Ciencia e Innovación”, Spain), “Ministerio de Ciencia, Innovación  
534 y Universidades” (Spain), ProID2020010093 (“Agencia Canaria de  
535 Investigación, Innovación y Sociedad de la Información” and European Social  
536 Fund), UNLL10-3E-783 (ERDF and “Fundación CajaCanarias”) and “SEGAI-  
537 ULL”. S.P-Y is funded by “Fundación Doctor Manuel Morales” (La Palma,  
538 Spain) and “Contrato Predoctoral Ministerio-ULL Formación de Doctores” (2019  
539 Program) (“Ministerio de Ciencia, Innovación y Universidades”, Spain). R.C-R is  
540 funded by RD16/0025/0011 and ProID2020010093 (“Agencia Canaria de  
541 Investigación, Innovación y Sociedad de la Información” and European Social  
542 Fund). J-E-H is funded by the Cabildo Tenerife “Agustin de Betancourt” 2017  
543 Program.  
544  
545

## 546 **Figures legends**

547 **Figure 1. Outline of the experimental model used for the analysis of Env**  
548 **expression, Env-mediated cell-to-cell fusion, viral transfer and viral**  
549 **infectivity.** (A) Env expression: HEK-293T cells will be co-transfected with  
550 primary of reference full-length viral *env* and a ptat  $\Delta env$  HIV-1 expression  
551 plasmid, allowing Env cell-surface expression in a viral production context. Cell-  
552 surface Env expression will be then analyzed by flow cytometry using specific  
553 anti-Env antibody. (B) Env-mediated fusion activity: after 24 hours, effector  
554 HEK-293T cells producing HIV-1 particles bearing primary or reference Envs  
555 will be co-cultured with TZM-bl cells to force synapsis formation and CD4-  
556 mediated binding of budding particles to target cells. (C) Env-mediated viral  
557 transfer: HEK-293T cells producing HIV-1 particles carrying primary or  
558 reference Envs will be co-cultured with primary CD4+ T cells. Then, HIV-1  
559 transfer will be analyzed by flow cytometry using specific anti-p24 antibody in  
560 target CD4+ T cells. (D) Env-mediated viral infection: TZM-bl cells will be  
561 infected with serial dilutions of viral particles obtained from transfected HEK-  
562 293T and carrying the different primary or reference HIV-1 Envs. After 48 hours,  
563 infectivity capacity will be analyzed by quantifying luciferase assay in infected  
564 TZM-bl cells.

565

566 **Figure 2. Analysis of the expression of the different HIV-1-Env**  
567 **glycoproteins from LTNP-EC, Viremic LTNP and control progressors**  
568 **patients.**

569 Flow cytometry analysis of the cell-surface expression level of the assayed HIV-  
570 1 Envs in HEK-293T cells from LTNP-EC (*gray bars*), vLTNP (*green bars*), Old  
571 (*orange bars*) and Modern individuals (*red bars*) or reference HIV-1 viral strains

572 (ptat, No Ab2, NL4.3 and BaL, *black bars*). Env protein expression for each  
573 patient (A) and Env protein expression in each group of patients comparing  
574 mean values between each group (Kruskal-Wallis, Dunn's Multiple  
575 Comparisons Test) (B); p value for comparison between all groups is shown,  
576 *top left*. Values are mean  $\pm$  S.E.M. of three independent experiments.

577

578 **Figure 3. Analysis of membranes fusion-phenotypic features of HIV-1**

579 **Envs isolated from LTNP-EC, viremic LTNP and P individuals.** Analysis of  
580 the ability to induce cell-to-cell fusion of HIV-1 Env proteins obtained from  
581 LTNP-EC (*gray bars*), vLTNP (*green bars*), Old (*orange bars*) and Modern  
582 individuals (*red bars*) or reference HIV-1 viral strains (ptat, NL4.3 and BaL,  
583 *black bars*). (A) Env fusogenic activity for each patient in each group. (B)  
584 Relative fusion activity of the full Env collection compared to the BaL control  
585 established at 100% and grouped in the different groups of patients. Values are  
586 mean  $\pm$  S.E.M. of three independent experiments. Statistical analysis was  
587 performed using Kruskal-Wallis, Dunn's Multiple Comparisons Test; p value for  
588 comparison between all groups is shown, *top left*.

589

590 **Figure 4. Analysis of HIV-1 Env-mediated cell-to-cell viral transfer.**

591 Analysis of the ability to induce cell-to-cell virus transfer of HIV-1 Env proteins obtained  
592 from LTNP-EC (*gray bars*), vLTNP (*green bars*), Old Patients (*orange bars*), recent  
593 patients (Moderns) (*red bars*) or reference HIV-1 viral strains (pSG3, CD4+ cells, NL4.3  
594 and BaL, *black bars*). Analysis of HIV-1 Env-mediated cell-to-cell viral transfer for each  
595 patient (A) and in each group where P values compare medians between groups using  
596 a nonparametric Kruskal-Wallis Test (Kruskal-Wallis, Dunn's Multiple Comparisons

597 Test) (B); p value for comparison between all groups is shown, *top left*. Values  
598 are mean  $\pm$  S.E.M. of two independent experiments.

599

600 **Figure 5. Viral infectivity of the viral Envs.**

601 Analysis of the infectivity (TCID<sub>50</sub> value normalized by viral p24 input) of the different of  
602 HIV-1 Env proteins obtained from LTNP-EC (*gray bars*), vLTNP (*green bars*), Old  
603 (*orange bars*) and Moderns (*red bars*) patients or reference HIV-1 viral strains (pSG3,  
604 NL4.3 and BaL, *black bars*). Analysis of Env infectivity for each patient (A) and in each  
605 group where P values compare medians between groups using a nonparametric  
606 Kruskal-Wallis, Dunn's Multiple Comparisons Test (B); p value for comparison  
607 between all groups is shown, *top left*. Values are mean  $\pm$  S.E.M. of three  
608 independent experiments.

609

610 **Figure 6. Analysis of the correlation of the fusion, transfer and viral  
611 infectivity Env characteristics between groups.**

612 (A) Correlation between Relative fusion and HIV Transfer of all Envs of the  
613 different groups LTNP-EC (*gray circle*), vLTNP (*green circle*), Old patients  
614 (*orange square*) and Modern patients (*red square*). The correlation was  
615 calculated with a nonparametric Spearman test. (B) Correlation between  
616 Relative fusion and Infectivity (TCID<sub>50</sub> value normalized by viral p24 input) of all  
617 Envs of the different groups LTNP-EC (*gray circle*), vLTNP (*green circle*), Old  
618 patients (*orange square*) and Modern patients (*red square*). The correlation was  
619 calculated with a nonparametric Spearman test. (C) Correlation between  
620 Infectivity and HIV Transfer of all Envs of the different groups LTNP-EC (*gray  
621 circle*), vLTNP (*green circle*), Old patients (*orange square*) and recent patients  
622 Moderns) (*red square*) is shown. The correlation was calculated with a

623 nonparametric Spearman test. Values are mean  $\pm$  S.E.M. of three independent  
624 experiments; p value for comparison between all groups is shown, *top left*.

625

626 **Figure 7. Phylogenetic analysis of the vial Envs.**

627 The evolutionary history of the Env aa sequences was inferred as described in  
628 Materials and Methods using the Maximum Likelihood method and JTT matrix-  
629 based model (109). The tree with the highest log likelihood (-49687,86) is  
630 shown. The percentage of trees in which the associated taxa clustered together  
631 is shown next to the branches. Evolutionary analyses were conducted in MEGA  
632 X (110).

633

634 **Figure 8. Analysis of the length and glycosylation sites in the loops of the**  
635 **Envs from the different groups.**

636 Analysis of the length of each variable loops V1 (A), V2 (B), V3 (C), V4 (D), V5  
637 (E) and all variable loops together (F). The results were grouped (LTNP-ECs:  
638 *gray bar*, vLTNPs: *green bar*, Old patients: *orange bar*, and recent patients  
639 (Moderns): *red bar*) and compared using a nonparametric Kruskal-Wallis,  
640 Dunn's Multiple Comparisons Test; p value for comparison between all groups  
641 is shown, *top left*. Values are mean  $\pm$  S.E.M. of three independent experiments.

642

643 **Figure 9. Correlation of the expression, fusion, transfer and viral**  
644 **infectivity Env characteristics with the nucleotide genetic distance to**  
645 **subtype B ancestor.**

646 Correlation between genetic distance to subtype B ancestor of all Envs of the  
647 different groups and Env expression (A), Relative fusion (B), HIV Transfer (C)  
648 and Infectivity (D). LTNP-ECs (*gray circle*), vLTNPs (*green circle*), Old patients



649 (*orange square*) and Modern patients (*red square*). The correlations were  
650 calculated with a nonparametric Spearman test ( $p$  and  $r$  values are shown, *top*  
651 *left*). Values of Env expression, Relative fusion, HIV transfer and Infectivity are  
652 mean  $\pm$  S.E.M. of three independent experiments.

653

654

## 655 References

656

- 657 1. **Fellay J, Ge D, Shianna KV, Colombo S, Ledergerber B, Cirulli ET, Urban TJ, Zhang K,**  
658 **Gumbs CE, Smith JP, Castagna A, Cozzi-Lepri A, De Luca A, Easterbrook P, Gunthard HF,**  
659 **Mallal S, Mussini C, Dalmau J, Martinez-Picado J, Miro JM, Obel N, Wolinsky SM, Martinson**  
660 **JJ, Detels R, Margolick JB, Jacobson LP, Descombes P, Antonarakis SE, Beckmann JS, O'Brien**  
661 **SJ, Letvin NL, McMichael AJ, Haynes BF, Carrington M, Feng S, Telenti A, Goldstein DB,**  
662 **Immunology NCFHAV.** 2009. Common genetic variation and the control of HIV-1 in humans.  
663 *PLoS Genet* **5**:e1000791.
- 664 2. **Naranbhai V, Carrington M.** 2017. Host genetic variation and HIV disease: from  
665 mapping to mechanism. *Immunogenetics* **69**:489-498.
- 666 3. **Migueles SA, Sabbaghian MS, Shupert WL, Bettinotti MP, Marincola FM, Martino L,**  
667 **Hallahan CW, Selig SM, Schwartz D, Sullivan J, Connors M.** 2000. HLA B\*5701 is highly  
668 associated with restriction of virus replication in a subgroup of HIV-infected long term  
669 nonprogressors. *Proc Natl Acad Sci U S A* **97**:2709-2714.
- 670 4. **Miura T, Brockman MA, Schneidewind A, Lobritz M, Pereyra F, Rathod A, Block BL,**  
671 **Brumme ZL, Brumme CJ, Baker B, Rothchild AC, Li B, Trocha A, Cutrell E, Frahm N, Brander C,**  
672 **Toth I, Arts EJ, Allen TM, Walker BD.** 2009. HLA-B57/B\*5801 human immunodeficiency virus  
673 type 1 elite controllers select for rare gag variants associated with reduced viral replication  
674 capacity and strong cytotoxic T-lymphocyte [corrected] recognition. *J Virol* **83**:2743-2755.
- 675 5. **Migueles SA, Connors M.** 2015. Success and failure of the cellular immune response  
676 against HIV-1. *Nat Immunol* **16**:563-570.
- 677 6. **Buckheit RW, 3rd, Allen TG, Alme A, Salgado M, O'Connell KA, Huculak S, Falade-**  
678 **Nwulia O, Williams TM, Gallant JE, Siliciano RF, Blankson JN.** 2012. Host factors dictate  
679 control of viral replication in two HIV-1 controller/chronic progressor transmission pairs. *Nat*  
680 *Commun* **3**:716.
- 681 7. **Goulder P, Deeks SG.** 2018. HIV control: Is getting there the same as staying there?  
682 *PLoS Pathog* **14**:e1007222.
- 683 8. **Cortes FH, de Paula HHS, Bello G, Ribeiro-Alves M, de Azevedo SSD, Caetano DG,**  
684 **Teixeira SLM, Hoagland B, Grinsztejn B, Veloso VG, Guimaraes ML, Morgado MG.** 2018.  
685 Plasmatic Levels of IL-18, IP-10, and Activated CD8(+) T Cells Are Potential Biomarkers to  
686 Identify HIV-1 Elite Controllers With a True Functional Cure Profile. *Front Immunol* **9**:1576.
- 687 9. **Martin-Gayo E, Buzon MJ, Ouyang Z, Hickman T, Cronin J, Pimenova D, Walker BD,**  
688 **Lichterfeld M, Yu XG.** 2015. Potent Cell-Intrinsic Immune Responses in Dendritic Cells Facilitate  
689 HIV-1-Specific T Cell Immunity in HIV-1 Elite Controllers. *PLoS Pathog* **11**:e1004930.
- 690 10. **Deeks SG, Walker BD.** 2007. Human immunodeficiency virus controllers: mechanisms  
691 of durable virus control in the absence of antiretroviral therapy. *Immunity* **27**:406-416.
- 692 11. **Pernas M, Casado C, Arcones C, Llano A, Sanchez-Merino V, Mothe B, Vicario JL, Grau**  
693 **E, Ruiz L, Sanchez J, Telenti A, Yuste E, Brander C, Galindez CL.** 2012. Low-replicating viruses  
694 and strong anti-viral immune response associated with prolonged disease control in a  
695 superinfected HIV-1 LTNP elite controller. *PLoS One* **7**:e31928.

- 696 12. **Carrington M, Walker BD.** 2012. Immunogenetics of spontaneous control of HIV. *Annu*  
697 *Rev Med* **63**:131-145.
- 698 13. **Migueles SA, Osborne CM, Royce C, Compton AA, Joshi RP, Weeks KA, Rood JE,**  
699 **Berkley AM, Sacha JB, Cogliano-Shutta NA, Lloyd M, Roby G, Kwan R, McLaughlin M, Stallings**  
700 **S, Rehm C, O'Shea MA, Mican J, Packard BZ, Komoriya A, Palmer S, Wiegand AP, Maldarelli F,**  
701 **Coffin JM, Mellors JW, Hallahan CW, Follman DA, Connors M.** 2008. Lytic granule loading of  
702 CD8+ T cells is required for HIV-infected cell elimination associated with immune control.  
703 *Immunity* **29**:1009-1021.
- 704 14. **Goulder PJ, Phillips RE, Colbert RA, McAdam S, Ogg G, Nowak MA, Giangrande P,**  
705 **Luzzi G, Morgan B, Edwards A, McMichael AJ, Rowland-Jones S.** 1997. Late escape from an  
706 immunodominant cytotoxic T-lymphocyte response associated with progression to AIDS. *Nat*  
707 *Med* **3**:212-217.
- 708 15. **Buckheit RW, 3rd, Salgado M, Siliciano RF, Blankson JN.** 2012. Inhibitory potential of  
709 subpopulations of CD8+ T cells in HIV-1-infected elite suppressors. *J Virol* **86**:13679-13688.
- 710 16. **Blankson JN.** 2010. Effector mechanisms in HIV-1 infected elite controllers: highly  
711 active immune responses? *Antiviral Res* **85**:295-302.
- 712 17. **Casado C, Pernas M, Sandonis V, Alvaro-Cifuentes T, Olivares I, Fuentes R, Martinez-**  
713 **Prats L, Grau E, Ruiz L, Delgado R, Rodriguez C, del Romero J, Lopez-Galindez C.** 2013.  
714 Identification of a cluster of HIV-1 controllers infected with low replicating viruses. *PLoS One*  
715 **8**:e77663.
- 716 18. **Casado C, Marrero-Hernandez S, Marquez-Arce D, Pernas M, Marfil S, Borrás-**  
717 **Granana F, Olivares I, Cabrera-Rodriguez R, Valera MS, de Armas-Rillo L, Lemey P, Blanco J,**  
718 **Valenzuela-Fernandez A, Lopez-Galindez C.** 2018. Viral Characteristics Associated with the  
719 Clinical Nonprogressor Phenotype Are Inherited by Viruses from a Cluster of HIV-1 Elite  
720 Controllers. *mBio* **9**.
- 721 19. **Cabrera-Rodriguez R, Heilmann V, Marfil S, Pernas M, Marrero-Hernandez S, Cabrera**  
722 **C, Urrea V, Casado C, Olivares I, Marquez-Arce D, Perez-Yanes S, Estevez-Herrera J, Clotet B,**  
723 **Espert L, Lopez-Galindez C, Biard-Piechaczyk M, Valenzuela-Fernandez A, Blanco J.** 2019. HIV-  
724 1 envelope glycoproteins isolated from Viremic Non-Progressor individuals are fully functional  
725 and cytopathic. *Sci Rep* **9**:5544.
- 726 20. **Lassen KG, Lobritz MA, Bailey JR, Johnston S, Nguyen S, Lee B, Chou T, Siliciano RF,**  
727 **Markowitz M, Arts EJ.** 2009. Elite suppressor-derived HIV-1 envelope glycoproteins exhibit  
728 reduced entry efficiency and kinetics. *PLoS Pathog* **5**:e1000377.
- 729 21. **Dalmau J, Puertas MC, Azuara M, Marino A, Frahm N, Mothe B, Izquierdo-Useros N,**  
730 **Buzon MJ, Paredes R, Matas L, Allen TM, Brander C, Rodrigo C, Clotet B, Martinez-Picado J.**  
731 2009. Contribution of immunological and virological factors to extremely severe primary HIV  
732 type 1 infection. *Clin Infect Dis* **48**:229-238.
- 733 22. **Jarrin I, Pantazis N, Dalmau J, Phillips AN, Olson A, Mussini C, Boufassa F, Costagliola**  
734 **D, Porter K, Blanco J, Del Amo J, Martinez-Picado J.** 2015. Does rapid HIV disease progression  
735 prior to combination antiretroviral therapy hinder optimal CD4+ T-cell recovery once HIV-1  
736 suppression is achieved? *Aids* **29**:2323-2333.
- 737 23. **Casado C, Galvez C, Pernas M, Tarancon-Diez L, Rodriguez C, Sanchez-Merino V, Vera**  
738 **M, Olivares I, De Pablo-Bernal R, Merino-Mansilla A, Del Romero J, Lorenzo-Redondo R, Ruiz-**

- 739 **Mateos E, Salgado M, Martinez-Picado J, Lopez-Galindez C.** 2020. Permanent control of HIV-1  
740 pathogenesis in exceptional elite controllers: a model of spontaneous cure. *Sci Rep* **10**:1902.
- 741 24. **Lopez-Galindez C, Pernas M, Casado C, Olivares I, Lorenzo-Redondo R.** 2019. Elite  
742 controllers and lessons learned for HIV-1 cure. *Curr Opin Virol* **38**:31-36.
- 743 25. **Checkley MA, Luttge BG, Freed EO.** 2011. HIV-1 envelope glycoprotein biosynthesis,  
744 trafficking, and incorporation. *J Mol Biol* **410**:582-608.
- 745 26. **Berger EA.** 2015. Finding Fusin/CXCR4, the First "2nd Receptor" for HIV Entry. *Front*  
746 *Immunol* **6**:283.
- 747 27. **Miedema F, Meyaard L, Koot M, Klein MR, Roos MT, Groenink M, Fouchier RA, Van't**  
748 **Wout AB, Tersmette M, Schellekens PT, et al.** 1994. Changing virus-host interactions in the  
749 course of HIV-1 infection. *Immunol Rev* **140**:35-72.
- 750 28. **Beitari S, Wang Y, Liu SL, Liang C.** 2019. HIV-1 Envelope Glycoprotein at the Interface  
751 of Host Restriction and Virus Evasion. *Viruses* **11**.
- 752 29. **Engelman A, Cherepanov P.** 2012. The structural biology of HIV-1: mechanistic and  
753 therapeutic insights. *Nat Rev Microbiol* **10**:279-290.
- 754 30. **Chan DC, Kim PS.** 1998. HIV entry and its inhibition. *Cell* **93**:681-684.
- 755 31. **Wyatt R, Sodroski J.** 1998. The HIV-1 envelope glycoproteins: fusogens, antigens, and  
756 immunogens. *Science* **280**:1884-1888.
- 757 32. **Alkhatib G, Combadiere C, Broder CC, Feng Y, Kennedy PE, Murphy PM, Berger EA.**  
758 1996. CC CKR5: a RANTES, MIP-1alpha, MIP-1beta receptor as a fusion cofactor for  
759 macrophage-tropic HIV-1. *Science* **272**:1955-1958.
- 760 33. **Choe H, Farzan M, Sun Y, Sullivan N, Rollins B, Ponath PD, Wu L, Mackay CR, LaRosa**  
761 **G, Newman W, Gerard N, Gerard C, Sodroski J.** 1996. The beta-chemokine receptors CCR3 and  
762 CCR5 facilitate infection by primary HIV-1 isolates. *Cell* **85**:1135-1148.
- 763 34. **Oberlin E, Amara A, Bachelier F, Bessia C, Virelizier JL, Arenzana-Seisdedos F,**  
764 **Schwartz O, Heard JM, Clark-Lewis I, Legler DF, Loetscher M, Baggiolini M, Moser B.** 1996.  
765 The CXC chemokine SDF-1 is the ligand for LESTR/fusin and prevents infection by T-cell-line-  
766 adapted HIV-1. *Nature* **382**:833-835.
- 767 35. **Feng Y, Broder CC, Kennedy PE, Berger EA.** 1996. HIV-1 entry cofactor: functional  
768 cDNA cloning of a seven-transmembrane, G protein-coupled receptor. *Science* **272**:872-877.
- 769 36. **Deng H, Liu R, Ellmeier W, Choe S, Unutmaz D, Burkhart M, Di Marzio P, Marmon S,**  
770 **Sutton RE, Hill CM, Davis CB, Peiper SC, Schall TJ, Littman DR, Landau NR.** 1996. Identification  
771 of a major co-receptor for primary isolates of HIV-1. *Nature* **381**:661-666.
- 772 37. **Dalgleish AG, Beverley PC, Clapham PR, Crawford DH, Greaves MF, Weiss RA.** 1984.  
773 The CD4 (T4) antigen is an essential component of the receptor for the AIDS retrovirus. *Nature*  
774 **312**:763-767.
- 775 38. **Klatzmann D, Champagne E, Chamaret S, Gruest J, Guetard D, Hercend T, Gluckman**  
776 **JC, Montagnier L.** 1984. T-lymphocyte T4 molecule behaves as the receptor for human  
777 retrovirus LAV. *Nature* **312**:767-768.

- 778 39. **Blanco J, Valenzuela A, Herrera C, Lluís C, Hovanessian AG, Franco R.** 2000. The HIV-1  
779 gp120 inhibits the binding of adenosine deaminase to CD26 by a mechanism modulated by  
780 CD4 and CXCR4 expression. *FEBS Lett* **477**:123-128.
- 781 40. **Garcia-Perez J, Staropoli I, Azoulay S, Heinrich JT, Cascajero A, Colin P, Lortat-Jacob H,**  
782 **Arenzana-Seisdedos F, Alcami J, Kellenberger E, Lagane B.** 2015. A single-residue change in  
783 the HIV-1 V3 loop associated with maraviroc resistance impairs CCR5 binding affinity while  
784 increasing replicative capacity. *Retrovirology* **12**:50.
- 785 41. **Colin P, Bénureau Y, Staropoli I, Wang Y, Gonzalez N, Alcami J, Hartley O, Brelot A,**  
786 **Arenzana-Seisdedos F, Lagane B.** 2013. HIV-1 exploits CCR5 conformational heterogeneity to  
787 escape inhibition by chemokines. *Proc Natl Acad Sci U S A* **110**:9475-9480.
- 788 42. **Herschhorn A, Gu C, Moraca F, Ma X, Farrell M, Smith AB, 3rd, Pancera M, Kwong PD,**  
789 **Schön A, Freire E, Abrams C, Blanchard SC, Mothes W, Sodroski JG.** 2017. The  $\beta$ 20- $\beta$ 21 of  
790 gp120 is a regulatory switch for HIV-1 Env conformational transitions. *Nat Commun* **8**:1049.
- 791 43. **Valenzuela-Fernandez A, Alvarez S, Gordon-Alonso M, Barrero M, Ursa A, Cabrero JR,**  
792 **Fernandez G, Naranjo-Suarez S, Yanez-Mo M, Serrador JM, Munoz-Fernandez MA, Sanchez-**  
793 **Madrid F.** 2005. Histone deacetylase 6 regulates human immunodeficiency virus type 1  
794 infection. *Mol Biol Cell* **16**:5445-5454.
- 795 44. **Garcia-Exposito L, Ziglio S, Barroso-Gonzalez J, de Armas-Rillo L, Valera MS, Zipeto D,**  
796 **Machado JD, Valenzuela-Fernandez A.** 2013. Gelsolin activity controls efficient early HIV-1  
797 infection. *Retrovirology* **10**:39.
- 798 45. **Barrero-Villar M, Cabrero JR, Gordon-Alonso M, Barroso-Gonzalez J, Alvarez-Losada**  
799 **S, Munoz-Fernandez MA, Sanchez-Madrid F, Valenzuela-Fernandez A.** 2009. Moesin is  
800 required for HIV-1-induced CD4-CXCR4 interaction, F-actin redistribution, membrane fusion  
801 and viral infection in lymphocytes. *J Cell Sci* **122**:103-113.
- 802 46. **Kafando A, Martineau C, El-Far M, Fournier E, Doualla-Bell F, Serhir B, Kazienga A,**  
803 **Sangare MN, Sylla M, Chamberland A, Charest H, Tremblay CL.** 2019. HIV-1 Envelope  
804 Glycoprotein Amino Acids Signatures Associated with Clade B Transmitted/Founder and  
805 Recent Viruses. *Viruses* **11**.
- 806 47. **Marconi V, Bonhoeffer S, Paredes R, Lu J, Hoh R, Martin JN, Deeks SG, Kuritzkes DR.**  
807 2008. Viral dynamics and in vivo fitness of HIV-1 in the presence and absence of enfuvirtide. *J*  
808 *Acquir Immune Defic Syndr* **48**:572-576.
- 809 48. **Blanco J, Bosch B, Fernandez-Figueras MT, Barretina J, Clotet B, Este JA.** 2004. High  
810 level of coreceptor-independent HIV transfer induced by contacts between primary CD4 T  
811 cells. *J Biol Chem* **279**:51305-51314.
- 812 49. **Curlin ME, Zioni R, Hawes SE, Liu Y, Deng W, Gottlieb GS, Zhu T, Mullins JI.** 2010. HIV-  
813 1 envelope subregion length variation during disease progression. *PLoS Pathog* **6**:e1001228.
- 814 50. **Yuan T, Li J, Zhang MY.** 2013. HIV-1 envelope glycoprotein variable loops are  
815 indispensable for envelope structural integrity and virus entry. *PLoS One* **8**:e69789.
- 816 51. **Sagar M, Wu X, Lee S, Overbaugh J.** 2006. Human immunodeficiency virus type 1 V1-  
817 V2 envelope loop sequences expand and add glycosylation sites over the course of infection,  
818 and these modifications affect antibody neutralization sensitivity. *J Virol* **80**:9586-9598.

- 819 52. **Gnanakaran S, Bhattacharya T, Daniels M, Keele BF, Hraber PT, Lapedes AS, Shen T,**  
820 **Gaschen B, Krishnamoorthy M, Li H, Decker JM, Salazar-Gonzalez JF, Wang S, Jiang C, Gao F,**  
821 **Swanstrom R, Anderson JA, Ping LH, Cohen MS, Markowitz M, Goepfert PA, Saag MS, Eron JJ,**  
822 **Hicks CB, Blattner WA, Tomaras GD, Asmal M, Letvin NL, Gilbert PB, Decamp AC, Magaret**  
823 **CA, Schief WR, Ban YE, Zhang M, Soderberg KA, Sodroski JG, Haynes BF, Shaw GM, Hahn BH,**  
824 **Korber B.** 2011. Recurrent signature patterns in HIV-1 B clade envelope glycoproteins  
825 associated with either early or chronic infections. *PLoS Pathog* **7**:e1002209.
- 826 53. **Wang S, Voronin Y, Zhao P, Ishihara M, Mehta N, Porterfield M, Chen Y, Bartley C, Hu**  
827 **G, Han D, Wells L, Tiemeyer M, Lu S.** 2020. Glycan Profiles of gp120 Protein Vaccines from  
828 Four Major HIV-1 Subtypes Produced from Different Host Cell Lines under Non-GMP or GMP  
829 Conditions. *J Virol* **94**.
- 830 54. **Go EP, Irungu J, Zhang Y, Dalpathado DS, Liao HX, Sutherland LL, Alam SM, Haynes**  
831 **BF, Desaire H.** 2008. Glycosylation site-specific analysis of HIV envelope proteins (JR-FL and  
832 CON-S) reveals major differences in glycosylation site occupancy, glycoform profiles, and  
833 antigenic epitopes' accessibility. *J Proteome Res* **7**:1660-1674.
- 834 55. **Sterjovski J, Churchill MJ, Ellett A, Gray LR, Roche MJ, Dunfee RL, Purcell DF, Saksena**  
835 **N, Wang B, Sonza S, Wesselingh SL, Karlsson I, Fenyo EM, Gabuzda D, Cunningham AL, Gorry**  
836 **PR.** 2007. Asn 362 in gp120 contributes to enhanced fusogenicity by CCR5-restricted HIV-1  
837 envelope glycoprotein variants from patients with AIDS. *Retrovirology* **4**:89.
- 838 56. **Coffin JM.** 1995. HIV population dynamics in vivo: implications for genetic variation,  
839 pathogenesis, and therapy. *Science* **267**:483-489.
- 840 57. **Fideli US, Allen SA, Musonda R, Trask S, Hahn BH, Weiss H, Mulenga J, Kasolo F,**  
841 **Vermund SH, Aldrovandi GM.** 2001. Virologic and immunologic determinants of heterosexual  
842 transmission of human immunodeficiency virus type 1 in Africa. *AIDS Res Hum Retroviruses*  
843 **17**:901-910.
- 844 58. **Hecht FM, Hartogensis W, Bragg L, Bacchetti P, Atchison R, Grant R, Barbour J, Deeks**  
845 **SG.** 2010. HIV RNA level in early infection is predicted by viral load in the transmission source.  
846 *AIDS* **24**:941-945.
- 847 59. **Mellors JW, Kingsley LA, Rinaldo CR, Jr., Todd JA, Hoo BS, Kokka RP, Gupta P.** 1995.  
848 Quantitation of HIV-1 RNA in plasma predicts outcome after seroconversion. *Ann Intern Med*  
849 **122**:573-579.
- 850 60. **Mellors JW, Rinaldo CR, Jr., Gupta P, White RM, Todd JA, Kingsley LA.** 1996. Prognosis  
851 in HIV-1 infection predicted by the quantity of virus in plasma. *Science* **272**:1167-1170.
- 852 61. **Pilcher CD, Joaki G, Hoffman IF, Martinson FE, Mapanje C, Stewart PW, Powers KA,**  
853 **Galvin S, Chilongozi D, Gama S, Price MA, Fiscus SA, Cohen MS.** 2007. Amplified transmission  
854 of HIV-1: comparison of HIV-1 concentrations in semen and blood during acute and chronic  
855 infection. *AIDS* **21**:1723-1730.
- 856 62. **Quinn TC, Wawer MJ, Sewankambo N, Serwadda D, Li C, Wabwire-Mangen F,**  
857 **Meehan MO, Lutalo T, Gray RH.** 2000. Viral load and heterosexual transmission of human  
858 immunodeficiency virus type 1. Rakai Project Study Group. *N Engl J Med* **342**:921-929.
- 859 63. **Yue L, Prentice HA, Farmer P, Song W, He D, Lakhi S, Goepfert P, Gilmour J, Allen S,**  
860 **Tang J, Kaslow RA, Hunter E.** 2013. Cumulative impact of host and viral factors on HIV-1 viral-  
861 load control during early infection. *J Virol* **87**:708-715.



- 862 64. **Balasubramaniam M, Pandhare J, Dash C.** 2019. Immune Control of HIV. *J Life Sci*  
863 (Westlake Village) **1**:4-37.
- 864 65. **van Gils MJ, Bunnik EM, Boeser-Nunnink BD, Burger JA, Terlouw-Klein M, Verwer N,**  
865 **Schuitemaker H.** 2011. Longer V1V2 region with increased number of potential N-linked  
866 glycosylation sites in the HIV-1 envelope glycoprotein protects against HIV-specific neutralizing  
867 antibodies. *J Virol* **85**:6986-6995.
- 868 66. **Rong R, Bibollet-Ruche F, Mulenga J, Allen S, Blackwell JL, Derdeyn CA.** 2007. Role of  
869 V1V2 and other human immunodeficiency virus type 1 envelope domains in resistance to  
870 autologous neutralization during clade C infection. *J Virol* **81**:1350-1359.
- 871 67. **Moore PL, Gray ES, Choge IA, Ranchobe N, Mlisana K, Abdool Karim SS, Williamson C,**  
872 **Morris L.** 2008. The c3-v4 region is a major target of autologous neutralizing antibodies in  
873 human immunodeficiency virus type 1 subtype C infection. *J Virol* **82**:1860-1869.
- 874 68. **Castro E, Bélair M, Rizzardi GP, Bart PA, Pantaleo G, Graziosi C.** 2008. Independent  
875 evolution of hypervariable regions of HIV-1 gp120: V4 as a swarm of N-Linked glycosylation  
876 variants. *AIDS Res Hum Retroviruses* **24**:106-113.
- 877 69. **Davenport YW, West AP, Jr., Bjorkman PJ.** 2016. Structure of an HIV-2 gp120 in  
878 Complex with CD4. *J Virol* **90**:2112-2118.
- 879 70. **Wang L, Izadmehr S, Kamau E, Kong XP, Chen BK.** 2019. Sequential trafficking of Env  
880 and Gag to HIV-1 T cell virological synapses revealed by live imaging. *Retrovirology* **16**:2.
- 881 71. **Mishra N, Makhdoomi MA, Sharma S, Kumar S, Dobhal A, Kumar D, Chawla H, Singh**  
882 **R, Kanga U, Das BK, Lodha R, Kabra SK, Luthra K.** 2019. Viral Characteristics Associated with  
883 Maintenance of Elite Neutralizing Activity in Chronically HIV-1 Clade C-Infected Monozygotic  
884 Pediatric Twins. *J Virol* **93**.
- 885 72. **Coffin J, Swanstrom R.** 2013. HIV pathogenesis: dynamics and genetics of viral  
886 populations and infected cells. *Cold Spring Harb Perspect Med* **3**:a012526.
- 887 73. **Andreano E, Rappuoli R.** 2021. SARS-CoV-2 escaped natural immunity, raising  
888 questions about vaccines and therapies. *Nat Med* **27**:759-761.
- 889 74. **Garcia-Beltran WF, Lam EC, St Denis K, Nitido AD, Garcia ZH, Hauser BM, Feldman J,**  
890 **Pavlovic MN, Gregory DJ, Poznansky MC, Sigal A, Schmidt AG, lafrate AJ, Naranbhai V, Balazs**  
891 **AB.** 2021. Multiple SARS-CoV-2 variants escape neutralization by vaccine-induced humoral  
892 immunity. *Cell* **184**:2372-2383.e2379.
- 893 75. **Bieniasz PD, Fridell RA, Aramori I, Ferguson SS, Caron MG, Cullen BR.** 1997. HIV-1-  
894 induced cell fusion is mediated by multiple regions within both the viral envelope and the CCR-  
895 5 co-receptor. *Embo j* **16**:2599-2609.
- 896 76. **Isaka Y, Sato A, Miki S, Kawauchi S, Sakaida H, Hori T, Uchiyama T, Adachi A, Hayami**  
897 **M, Fujiwara T, Yoshie O.** 1999. Small amino acid changes in the V3 loop of human  
898 immunodeficiency virus type 2 determines the coreceptor usage for CXCR4 and CCR5. *Virology*  
899 **264**:237-243.
- 900 77. **Cocchi F, DeVico AL, Garzino-Demo A, Cara A, Gallo RC, Lusso P.** 1996. The V3 domain  
901 of the HIV-1 gp120 envelope glycoprotein is critical for chemokine-mediated blockade of  
902 infection. *Nat Med* **2**:1244-1247.

- 903 78. **Speck RF, Wehrly K, Platt EJ, Atchison RE, Charo IF, Kabat D, Chesebro B, Goldsmith**  
904 **MA.** 1997. Selective employment of chemokine receptors as human immunodeficiency virus  
905 type 1 coreceptors determined by individual amino acids within the envelope V3 loop. *J Virol*  
906 **71**:7136-7139.
- 907 79. **Wu L, Gerard NP, Wyatt R, Choe H, Parolin C, Ruffing N, Borsetti A, Cardoso AA,**  
908 **Desjardin E, Newman W, Gerard C, Sodroski J.** 1996. CD4-induced interaction of primary HIV-1  
909 gp120 glycoproteins with the chemokine receptor CCR-5. *Nature* **384**:179-183.
- 910 80. **Trkola A, Dragic T, Arthos J, Binley JM, Olson WC, Allaway GP, Cheng-Mayer C,**  
911 **Robinson J, Maddon PJ, Moore JP.** 1996. CD4-dependent, antibody-sensitive interactions  
912 between HIV-1 and its co-receptor CCR-5. *Nature* **384**:184-187.
- 913 81. **Valenzuela A, Blanco J, Krust B, Franco R, Hovanessian AG.** 1997. Neutralizing  
914 antibodies against the V3 loop of human immunodeficiency virus type 1 gp120 block the CD4-  
915 dependent and -independent binding of virus to cells. *J Virol* **71**:8289-8298.
- 916 82. **Pollakis G, Baan E, van Werkhoven MB, Berkhout B, Bakker M, Jurriaans S, Paxton**  
917 **WA.** 2015. Association between gp120 envelope V1V2 and V4V5 variable loop profiles in a  
918 defined HIV-1 transmission cluster. *Aids* **29**:1161-1171.
- 919 83. **Liu Y, Curlin ME, Diem K, Zhao H, Ghosh AK, Zhu H, Woodward AS, Maenza J, Stevens**  
920 **CE, Stekler J, Collier AC, Genowati I, Deng W, Zioni R, Corey L, Zhu T, Mullins JI.** 2008. Env  
921 length and N-linked glycosylation following transmission of human immunodeficiency virus  
922 Type 1 subtype B viruses. *Virology* **374**:229-233.
- 923 84. **Dang LVP, Pham HV, Dinh TT, Nguyen TH, Vu QTH, Vu NTP, Le PTB, Nguyen LV, Le HT,**  
924 **Vu PT, Olson L.** 2020. Characterization of envelope sequence of HIV virus in children infected  
925 with HIV in Vietnam. *SAGE Open Med* **8**:2050312120937198.
- 926 85. **Fraser C, Lythgoe K, Leventhal GE, Shirreff G, Hollingsworth TD, Alizon S, Bonhoeffer**  
927 **S.** 2014. Virulence and pathogenesis of HIV-1 infection: an evolutionary perspective. *Science*  
928 **343**:1243727.
- 929 86. **Fischer W, Ganusov VV, Giorgi EE, Hraber PT, Keele BF, Leitner T, Han CS, Gleasner**  
930 **CD, Green L, Lo CC, Nag A, Wallstrom TC, Wang S, McMichael AJ, Haynes BF, Hahn BH,**  
931 **Perelson AS, Borrow P, Shaw GM, Bhattacharya T, Korber BT.** 2010. Transmission of single  
932 HIV-1 genomes and dynamics of early immune escape revealed by ultra-deep sequencing. *PLoS*  
933 *One* **5**:e12303.
- 934 87. **Quan Y, Liang C, Brenner BG, Wainberg MA.** 2009. Multidrug-resistant variants of HIV  
935 type 1 (HIV-1) can exist in cells as defective quasispecies and be rescued by superinfection with  
936 other defective HIV-1 variants. *J Infect Dis* **200**:1479-1483.
- 937 88. **Roche M, Jakobsen MR, Sterjovski J, Ellett A, Posta F, Lee B, Jubb B, Westby M, Lewin**  
938 **SR, Ramsland PA, Churchill MJ, Gorry PR.** 2011. HIV-1 escape from the CCR5 antagonist  
939 maraviroc associated with an altered and less-efficient mechanism of gp120-CCR5 engagement  
940 that attenuates macrophage tropism. *J Virol* **85**:4330-4342.
- 941 89. **Keele BF, Giorgi EE, Salazar-Gonzalez JF, Decker JM, Pham KT, Salazar MG, Sun C,**  
942 **Grayson T, Wang S, Li H, Wei X, Jiang C, Kirchherr JL, Gao F, Anderson JA, Ping LH, Swanstrom**  
943 **R, Tomaras GD, Blattner WA, Goepfert PA, Kilby JM, Saag MS, Delwart EL, Busch MP, Cohen**  
944 **MS, Montefiori DC, Haynes BF, Gaschen B, Athreya GS, Lee HY, Wood N, Seoighe C, Perelson**  
945 **AS, Bhattacharya T, Korber BT, Hahn BH, Shaw GM.** 2008. Identification and characterization



- 946 of transmitted and early founder virus envelopes in primary HIV-1 infection. Proc Natl Acad Sci  
947 U S A **105**:7552-7557.
- 948 90. **Hunt PW, Harrigan PR, Huang W, Bates M, Williamson DW, McCune JM, Price RW,**  
949 **Spudich SS, Lampiris H, Hoh R, Leigler T, Martin JN, Deeks SG.** 2006. Prevalence of CXCR4  
950 tropism among antiretroviral-treated HIV-1-infected patients with detectable viremia. J Infect  
951 Dis **194**:926-930.
- 952 91. **Moore PL, Gray ES, Morris L.** 2009. Specificity of the autologous neutralizing antibody  
953 response. Curr Opin HIV AIDS **4**:358-363.
- 954 92. **Kassaye S, Johnston E, McColgan B, Kantor R, Zijenah L, Katzenstein D.** 2009.  
955 Envelope coreceptor tropism, drug resistance, and viral evolution among subtype C HIV-1-  
956 infected individuals receiving nonsuppressive antiretroviral therapy. J Acquir Immune Defic  
957 Syndr **50**:9-18.
- 958 93. **Shi B, Kitchen C, Weiser B, Mayers D, Foley B, Kemal K, Anastos K, Suchard M, Parker**  
959 **M, Brunner C, Burger H.** 2010. Evolution and recombination of genes encoding HIV-1 drug  
960 resistance and tropism during antiretroviral therapy. Virology **404**:5-20.
- 961 94. **Duenas-Decamp MJ, Peters P, Burton D, Clapham PR.** 2008. Natural resistance of  
962 human immunodeficiency virus type 1 to the CD4bs antibody b12 conferred by a glycan and an  
963 arginine residue close to the CD4 binding loop. J Virol **82**:5807-5814.
- 964 95. **Salazar-Gonzalez JF, Bailes E, Pham KT, Salazar MG, Guffey MB, Keele BF, Derdeyn**  
965 **CA, Farmer P, Hunter E, Allen S, Manigart O, Mulenga J, Anderson JA, Swanstrom R, Haynes**  
966 **BF, Athreya GS, Korber BT, Sharp PM, Shaw GM, Hahn BH.** 2008. Deciphering human  
967 immunodeficiency virus type 1 transmission and early envelope diversification by single-  
968 genome amplification and sequencing. J Virol **82**:3952-3970.
- 969 96. **Kitrinos KM, Hoffman NG, Nelson JA, Swanstrom R.** 2003. Turnover of env variable  
970 region 1 and 2 genotypes in subjects with late-stage human immunodeficiency virus type 1  
971 infection. J Virol **77**:6811-6822.
- 972 97. **Kitrinos KM, Nelson JA, Resch W, Swanstrom R.** 2005. Effect of a protease inhibitor-  
973 induced genetic bottleneck on human immunodeficiency virus type 1 env gene populations. J  
974 Virol **79**:10627-10637.
- 975 98. **Kitchen CM, Philpott S, Burger H, Weiser B, Anastos K, Suchard MA.** 2004. Evolution  
976 of human immunodeficiency virus type 1 coreceptor usage during antiretroviral Therapy: a  
977 Bayesian approach. J Virol **78**:11296-11302.
- 978 99. **Koot M, Keet IP, Vos AH, de Goede RE, Roos MT, Coutinho RA, Miedema F,**  
979 **Schellekens PT, Tersmette M.** 1993. Prognostic value of HIV-1 syncytium-inducing phenotype  
980 for rate of CD4+ cell depletion and progression to AIDS. Ann Intern Med **118**:681-688.
- 981 100. **Silver ZA, Dickinson GM, Seaman MS, Desrosiers RC.** 2019. A Highly Unusual V1  
982 Region of Env in an Elite Controller of HIV Infection. J Virol **93**.
- 983 101. **Desrosiers RC.** 1998. Prospects for live attenuated HIV. Nat Med **4**:982.
- 984 102. **Almond N, Stott J.** 1999. Live attenuated SIV--a model of a vaccine for AIDS. Immunol  
985 Lett **66**:167-170.

- 986 103. **Johnson RP.** 1999. Live attenuated AIDS vaccines: hazards and hopes. *Nat Med* **5**:154-  
987 155.
- 988 104. **Murphey-Corb M.** 1997. Live-attenuated HIV vaccines: how safe is safe enough? *Nat*  
989 *Med* **3**:17-18.
- 990 105. **Mills J, Desrosiers R, Rud E, Almond N.** 2000. Live attenuated HIV vaccines: a proposal  
991 for further research and development. *AIDS Res Hum Retroviruses* **16**:1453-1461.
- 992 106. **Baba TW, Liska V, Khimani AH, Ray NB, Dailey PJ, Penninck D, Bronson R, Greene MF,**  
993 **McClure HM, Martin LN, Ruprecht RM.** 1999. Live attenuated, multiply deleted simian  
994 immunodeficiency virus causes AIDS in infant and adult macaques. *Nat Med* **5**:194-203.
- 995 107. **Blower SM, Koelle K, Kirschner DE, Mills J.** 2001. Live attenuated HIV vaccines:  
996 predicting the tradeoff between efficacy and safety. *Proc Natl Acad Sci U S A* **98**:3618-3623.
- 997 108. **Curriu M, Fausther-Bovendo H, Pernas M, Massanella M, Carrillo J, Cabrera C, Lopez-**  
998 **Galindez C, Clotet B, Debre P, Vieillard V, Blanco J.** 2012. Viremic HIV infected individuals with  
999 high CD4 T cells and functional envelope proteins show anti-gp41 antibodies with unique  
1000 specificity and function. *PLoS One* **7**:e30330.
- 1001 109. **Jones DT, Taylor WR, Thornton JM.** 1992. The rapid generation of mutation data  
1002 matrices from protein sequences. *Comput Appl Biosci* **8**:275-282.
- 1003 110. **Kumar S, Stecher G, Li M, Knyaz C, Tamura K.** 2018. MEGA X: Molecular Evolutionary  
1004 Genetics Analysis across Computing Platforms. *Mol Biol Evol* **35**:1547-1549.  
1005  
1006  
1007

1008

**Table 1. Epidemiological, clinical and host characteristics of the viral Envs.**

| Clinical Group | Sub-group  | Env code <sup>a</sup> | Patient Identification code | Viral Load <sup>g</sup> (at sampling) | Diagnostic time  | Sampling time | Viral dating <sup>b</sup> | HLA B     |           |           |
|----------------|------------|-----------------------|-----------------------------|---------------------------------------|------------------|---------------|---------------------------|-----------|-----------|-----------|
| LTNP           | EC         | 1                     | 2057906-3                   | < 50                                  | 1993             | 2004          | 1989                      | 4901/5701 |           |           |
|                |            | 2                     | 3227050                     | < 50                                  | 1988             | 2004          | 1991                      | 0702/5201 |           |           |
|                |            | 3                     | 3227058-3                   | < 50                                  | 1992             | 2004          | 1991                      | 1402/1402 |           |           |
|                |            | 6                     | 20044616-3                  | < 50                                  | 1998             | 2004          | 1999                      | 1501/5703 |           |           |
|                |            | 7                     | 10246788                    | < 50                                  | 1992             | 2005          | 1993                      | 4402/5701 |           |           |
|                |            | 8                     |                             | < 50                                  | "                | "             | "                         | "         |           |           |
|                |            | 9                     | MDM <sup>c</sup>            | 507                                   | 1998             | 1996          | 1987                      | 4402/3501 |           |           |
|                |            | 10                    | c                           | < 50                                  | "                | 2011          | 1996                      | "         |           |           |
|                |            | 11                    | c                           | < 50                                  | "                | 2005          | "                         | "         |           |           |
|                |            | 12                    | c                           | < 50                                  | "                | 2005          | "                         | "         |           |           |
|                |            | Viremic               | 13                          | 4022834                               | 3.710            | 1994          | 2004                      | ND        | 1401/4403 |           |
|                |            |                       | 14                          | 9684                                  | 2.557            | 1998          | 2005                      | 1994      | 1302/4001 |           |
|                | 15         |                       | 2988465                     | 2.286                                 | 1993             | 2004          | 1999                      | 1402/2705 |           |           |
|                | 16         |                       | 38 17 5                     | 418                                   | 1996             | 2014          | 1999                      | 2705/5801 |           |           |
|                | 17         |                       |                             |                                       | "                | "             | "                         | "         |           |           |
|                | 18         |                       |                             |                                       | "                | "             | "                         | "         |           |           |
|                | 19         |                       |                             |                                       | "                | "             | "                         | "         |           |           |
|                | 21         |                       | 30                          | 7.597                                 | 1989             | 1998          | 2000                      | 1501/3501 |           |           |
|                | 22         |                       | 64                          | 11.926                                | 1989             | 1999          | 1999                      | 4402/4901 |           |           |
|                | 24         |                       |                             | "                                     | "                | 2002          | "                         | "         |           |           |
|                | Progressor |                       | Old                         | 26                                    | V10 <sup>d</sup> | N.D.          | 1993                      | 1994      | 1999      | 4002/4402 |
|                |            |                       |                             | 27                                    |                  |               | "                         | "         | "         |           |
|                |            | 28                    |                             | V13                                   | N.D.             | 1992          | 1994                      | 1990      | 0702/1402 |           |
|                |            | 30                    |                             | L10                                   | 89.000           | ---           | 1993                      | 1993      | 1501/4901 |           |
| 31             |            |                       |                             | "                                     | "                | "             | "                         | "         |           |           |
| 32             |            | L 11                  |                             | 42.000                                | 1993             | 1993          | 2000                      | 1801/5101 |           |           |
| 33             |            |                       |                             | "                                     | "                | "             | "                         | "         |           |           |
| 36             |            | I14 <sup>d</sup>      |                             | 130.000                               | 1987             | 1994          | 2002                      | 0702/3502 |           |           |
| 37             |            | d                     | "                           | "                                     | "                | "             | "                         |           |           |           |
| 38             |            | I18                   | 170.000                     | 1991                                  | 1994             | 1990          | 1402/4403                 |           |           |           |
| Modern         |            | 39                    | ESI 17A                     | 156.300                               | 2014             | 2013          | N.A. <sup>f</sup>         | 4201/4402 |           |           |
|                |            | 40                    |                             | "                                     | "                | "             | "                         | "         |           |           |
|                |            | 42                    | ESI 39A                     | 137.700                               | 2012             | 2014          | N.A.                      | 1517/3801 |           |           |
|                |            | 43                    |                             | "                                     | "                | "             | "                         | "         |           |           |
|                |            | 44                    | ESI 41A                     | 129.700                               | 2012             | 2014          | N.A.                      | 3503/5701 |           |           |
|                |            | 45                    |                             | "                                     | "                | "             | "                         | "         |           |           |
|                | 46         | ESI 5A 2              | 49.107                      | 2004                                  | 2007             | N.A.          | 4102/4402                 |           |           |           |
|                | 49         | ESI 42 A              | 11.510                      | 2011                                  | 2014             | N.A.          | 1402/4403                 |           |           |           |
| 50             |            | "                     | "                           | "                                     | "                | "             |                           |           |           |           |
| 51             | ESI 42 B   | 41.090                | 2011                        | 2014                                  | N.A.             | 0702/1501     |                           |           |           |           |
| 52             |            | "                     | "                           | "                                     | "                | "             |                           |           |           |           |

1009  
1010  
1011  
1012  
1013  
1014  
1015  
1016  
1017  
1018  
1019  
1020  
1021

<sup>a</sup>HIV-1 Env number used in this study and identification codes.

<sup>b</sup>According to Bello et al. (2004). *J Gen Virol.* Feb;85(Pt 2):399-407. doi: 10.1099/vir.0.19365-0. PMID: 14769897.

<sup>c</sup>Double infected individual (Casado et al. (2007) *J Infect Dis.* 2007 Sep 15;196(6):895-9. doi: 10.1086/520885. Epub 2007 Aug 14. PMID: 17703421).

<sup>d</sup>Individuals with a short antiviral therapy (AZT (zidovudine) and DDI (didanosine) for V10 patient and AZT for I14 patient).

<sup>e</sup>The Modern Individuals have been infected within 3 years.

<sup>f</sup>N.A.:Not applicable.

<sup>g</sup>HIV RNA copies/mL

\* Envs isolated from the same patient are indicated by brackets.

": same value than above.

1022

1023

1024

**Table 2. Molecular characteristics of HIV-1 Envs: sequence length and N potential glycosylation sites (PNGs) in the variable loops (Vn) of the gp120 subunit.**

| Clinical Group      | Subgroup | Env code | <sup>a</sup> V1/G | V2/G | V3/G | V4/G | V5/G | <sup>b</sup> ΣVn/G | <sup>c</sup> Mean/G | <sup>d</sup> Gp160 | <sup>e</sup> Mean |     |  |
|---------------------|----------|----------|-------------------|------|------|------|------|--------------------|---------------------|--------------------|-------------------|-----|--|
| LTNP                | EC       | 1        | 28/4              | 43/2 | 37/2 | 28/4 | 12/1 | 148/13             |                     | 848                |                   |     |  |
|                     |          | 2        | 33/5              | 41/2 | 37/2 | 31/4 | 12/1 | 154/14             |                     | 853                |                   |     |  |
|                     |          | 3        | 33/5              | 41/2 | 37/2 | 31/3 | 12/2 | 154/14             |                     | 853                |                   |     |  |
|                     |          | 6        | 28/3              | 41/2 | 37/2 | 34/4 | 12/1 | 152/12             |                     | 852                |                   |     |  |
|                     |          | 7        | 32/5              | 47/2 | 37/2 | 30/4 | 11/2 | 157/15             | 151.1/14.4          | 859                | 851.8             |     |  |
|                     |          | 8        | 32/5              | 47/2 | 37/2 | 30/4 | 11/2 | 157/15             |                     | 859                |                   |     |  |
|                     |          | 9        | 24/4              | 43/2 | 36/2 | 28/4 | 12/1 | 143/14             |                     | 843                |                   |     |  |
|                     |          | 10       | 27/4              | 42/2 | 37/2 | 29/5 | 14/2 | 149/16             |                     | 851                |                   |     |  |
|                     |          | 11       | 27/5              | 42/3 | 37/2 | 29/5 | 13/2 | 148/17             |                     | 850                |                   |     |  |
|                     |          | 12       | 27/4              | 42/3 | 37/2 | 32/5 | 12/1 | 150/14             |                     | 850                |                   |     |  |
|                     |          | Viremic  |                   | 13   | 31/5 | 41/2 | 37/2 | 31/4               | 13/1                | 153/14             |                   | 854 |  |
|                     |          |          |                   | 14   | 29/4 | 42/2 | 37/2 | 32/5               | 12/2                | 152/15             |                   | 852 |  |
| 15                  | 34/5     |          |                   | 41/2 | 37/2 | 36/5 | 12/1 | 160/15             |                     | 860                |                   |     |  |
| 16                  | 29/5     |          |                   | 41/2 | 37/1 | 29/5 | 12/1 | 148/14             |                     | 849                |                   |     |  |
| 17                  | 29/5     |          |                   | 41/2 | 37/2 | 29/5 | 12/1 | 148/16             | 150,3/14.1          | 849                | 851.5             |     |  |
| 18                  | 29/4     |          |                   | 41/2 | 37/2 | 29/5 | 12/1 | 148/15             |                     | 849                |                   |     |  |
| 19                  | 29/4     |          |                   | 41/2 | 37/2 | 29/5 | 12/1 | 148/14             |                     | 849                |                   |     |  |
| 21                  | 24/3     |          |                   | 41/2 | 37/1 | 30/5 | 10/0 | 142/11             |                     | 842                |                   |     |  |
| 22                  | 28/4     |          |                   | 41/2 | 37/2 | 32/5 | 12/1 | 150/14             |                     | 850                |                   |     |  |
| 24                  | 37/7     |          |                   | 41/2 | 36/2 | 32/5 | 12/1 | 158/15             |                     | 861                |                   |     |  |
| Progressor          | Old      | 26       | 31/4              | 41/3 | 37/2 | 39/7 | 14/2 | 160/18             |                     | 862                |                   |     |  |
|                     |          | 27       | 31/5              | 48/3 | 37/2 | 28/5 | 14/2 | 158/16             |                     | 858                |                   |     |  |
|                     |          | 28       | 25/5              | 41/2 | 36/2 | 33/5 | 12/2 | 145/15             |                     | 848                |                   |     |  |
|                     |          | 30       | 33/4              | 41/2 | 37/2 | 27/4 | 11/1 | 150/14             |                     | 852                |                   |     |  |
|                     |          | 31       | 33/5              | 41/2 | 37/2 | 36/5 | 13/2 | 158/16             |                     | 860                |                   |     |  |
|                     |          | 32       | 28/5              | 44/2 | 36/2 | 30/5 | 15/2 | 151/15             | 153,8/15.2          | 853                | 855.8             |     |  |
|                     |          | 33       | 31/4              | 44/2 | 36/2 | 30/5 | 15/2 | 156/14             |                     | 856                |                   |     |  |
|                     |          | 36       | 28/4              | 46/1 | 37/2 | 34/5 | 14/2 | 157/15             |                     | 859                |                   |     |  |
|                     |          | 37       | 28/4              | 46/2 | 37/2 | 34/5 | 14/2 | 157/16             |                     | 859                |                   |     |  |
|                     |          | 38       | 30/4              | 41/3 | 37/1 | 31/4 | 13/2 | 150/13             |                     | 851                |                   |     |  |
| Modern <sup>e</sup> |          | 39       | 31/4              | 41/2 | 37/2 | 29/4 | 12/2 | 149/14             |                     | 849                |                   |     |  |
|                     |          | 40       | 31/4              | 41/2 | 37   | 29/4 | 17/2 | 154/14             |                     | 849                |                   |     |  |
|                     |          | 42       | 29/4              | 48/2 | 37   | 36/6 | 17/2 | 167/13             |                     | 878                |                   |     |  |
|                     |          | 43       | 29/4              | 48/3 | 37   | 30/4 | 15/2 | 159/15             |                     | 872                |                   |     |  |
|                     |          | 44       | 28/4              | 47/3 | 37   | 31/4 | 15/2 | 158/15             | 158.1/14.7          | 859                | 862.0             |     |  |
|                     |          | 45       | 28/4              | 47/2 | 37   | 31/4 | 15/2 | 158/14             |                     | 859                |                   |     |  |

|           |      |      |    |      |      |        |     |
|-----------|------|------|----|------|------|--------|-----|
| <b>46</b> | 35/4 | 46/3 | 37 | 33/5 | 13/2 | 164/15 | 865 |
| <b>49</b> | 37/6 | 41/2 | 37 | 42/7 | 13/1 | 170/18 | 871 |
| <b>50</b> | 37/6 | 41/2 | 37 | 42/7 | 13/1 | 170/18 | 871 |
| <b>51</b> | 31/4 | 42/2 | 37 | 26/3 | 13/1 | 149/12 | 853 |
| <b>52</b> | 29/4 | 42/2 | 37 | 32/6 | 12/1 | 152/15 | 856 |

1025

1026

1027

1028

1029

1030

1031

1032

1033

1034

1035

1036

1037

1038

1039

1040

1041

1042

1043

1044

1045

1046

<sup>a</sup>Length in amino acid (aa) and potential glycosylation sites (PNGs) of the Env-gp120 variable regions (Vn; from V1 to V5) expressed as Vn/G ratio.

<sup>b</sup> $\Sigma Vn/G$  indicates the sum of the aa lengths of the Vn (n; from 1 to 5) and the potential G sites.

<sup>c</sup>Mean/G indicates the mean length and PNG value for each group of Envs.

<sup>d</sup>Gp160 shows the total length in aa of each Env including the gp41 subunit and the gp120 subunit.

<sup>e</sup>Mean gp160 length in aa for each group of Envs.

**Table 1. Epidemiological, clinical and host characteristics of the viral Envs.**

| Clinical Group | Sub-group  | Env code <sup>a</sup> | Patient Identification code | Viral Load <sup>g</sup> (at sampling) | Diagnostic time  | Sampling time | Viral dating <sup>b</sup> | HLA B     |           |           |
|----------------|------------|-----------------------|-----------------------------|---------------------------------------|------------------|---------------|---------------------------|-----------|-----------|-----------|
| LTNP           | EC         | 1                     | 2057906-3                   | < 50                                  | 1993             | 2004          | 1989                      | 4901/5701 |           |           |
|                |            | 2                     | 3227050                     | < 50                                  | 1988             | 2004          | 1991                      | 0702/5201 |           |           |
|                |            | 3                     | 3227058-3                   | < 50                                  | 1992             | 2004          | 1991                      | 1402/1402 |           |           |
|                |            | 6                     | 20044616-3                  | < 50                                  | 1998             | 2004          | 1999                      | 1501/5703 |           |           |
|                |            | * 7                   | 10246788                    | < 50                                  | 1992             | 2005          | 1993                      | 4402/5701 |           |           |
|                |            | 8                     |                             | < 50                                  | "                | "             | "                         | "         |           |           |
|                |            | 9                     | MDM <sup>c</sup>            | 507                                   | 1998             | 1996          | 1987                      | 4402/3501 |           |           |
|                |            | 10                    | <sup>c</sup>                | < 50                                  | "                | 2011          | 1996                      | "         |           |           |
|                |            | 11                    | <sup>c</sup>                | < 50                                  | "                | 2005          | "                         | "         |           |           |
|                |            | 12                    | <sup>c</sup>                | < 50                                  | "                | 2005          | "                         | "         |           |           |
|                |            | Viremic               | 13                          | 4022834                               | 3.710            | 1994          | 2004                      | ND        | 1401/4403 |           |
|                |            |                       | 14                          | 9684                                  | 2.557            | 1998          | 2005                      | 1994      | 1302/4001 |           |
|                | 15         |                       | 2988465                     | 2.286                                 | 1993             | 2004          | 1999                      | 1402/2705 |           |           |
|                | 16         |                       | 38 17 5                     | 418                                   | 1996             | 2014          | 1999                      | 2705/5801 |           |           |
|                | 17         |                       |                             |                                       | "                | "             | "                         | "         |           |           |
|                | 18         |                       |                             |                                       | "                | "             | "                         | "         |           |           |
|                | 19         |                       |                             |                                       | "                | "             | "                         | "         |           |           |
|                | 21         |                       | 30                          | 7.597                                 | 1989             | 1998          | 2000                      | 1501/3501 |           |           |
|                | 22         |                       | 64                          | 11.926                                | 1989             | 1999          | 1999                      | 4402/4901 |           |           |
|                | 24         |                       |                             |                                       | "                | "             | 2002                      | "         |           |           |
|                | Progressor |                       | Old                         | 26                                    | V10 <sup>d</sup> | N.D.          | 1993                      | 1994      | 1999      | 4002/4402 |
|                |            |                       |                             | 27                                    |                  |               |                           | "         | "         |           |
|                |            | 28                    |                             | V13                                   | N.D.             | 1992          | 1994                      | 1990      | 0702/1402 |           |
|                |            | 30                    |                             | L10                                   | 89.000           | ----          | 1993                      | 1993      | 1501/4901 |           |
| 31             |            |                       |                             | "                                     | "                | "             | "                         | "         |           |           |
| 32             |            | L 11                  |                             | 42.000                                | 1993             | 1993          | 2000                      | 1801/5101 |           |           |
| 33             |            |                       |                             | "                                     | "                | "             | "                         | "         |           |           |
| 36             |            | I14 <sup>d</sup>      |                             | 130.000                               | 1987             | 1994          | 2002                      | 0702/3502 |           |           |
| 37             |            | <sup>d</sup>          | "                           | "                                     | "                | "             | "                         |           |           |           |
| 38             |            | I18                   | 170.000                     | 1991                                  | 1994             | 1990          | 1402/4403                 |           |           |           |
| Modern         |            | 39                    | ESI 17A                     | 156.300                               | 2014             | 2013          | N.A. <sup>f</sup>         | 4201/4402 |           |           |
|                |            | 40                    |                             | "                                     | "                | "             | "                         | "         |           |           |
|                |            | 42                    | ESI 39A                     | 137.700                               | 2012             | 2014          | N.A.                      | 1517/3801 |           |           |
|                |            | 43                    |                             | "                                     | "                | "             | "                         | "         |           |           |
|                |            | 44                    | ESI 41A                     | 129.700                               | 2012             | 2014          | N.A.                      | 3503/5701 |           |           |
|                |            | 45                    |                             | "                                     | "                | "             | "                         | "         |           |           |
|                | 46         | ESI 5A 2              | 49.107                      | 2004                                  | 2007             | N.A.          | 4102/4402                 |           |           |           |
|                | 49         | ESI 42 A              | 11.510                      | 2011                                  | 2014             | N.A.          | 1402/4403                 |           |           |           |
| 50             |            | "                     | "                           | "                                     | "                | "             |                           |           |           |           |
| 51             | ESI 42 B   | 41.090                | 2011                        | 2014                                  | N.A.             | 0702/1501     |                           |           |           |           |
| 52             |            | "                     | "                           | "                                     | "                | "             |                           |           |           |           |

<sup>a</sup>HIV-1 Env number used in this study and identification codes.

<sup>b</sup>According to Bello et al. (2004). *J Gen Virol.* Feb;85(Pt 2):399-407. doi: 10.1099/vir.0.19365-0. PMID: 14769897.

<sup>c</sup>Double infected individual (Casado et al. (2007) *J Infect Dis.* 2007 Sep 15;196(6):895-9. doi: 10.1086/520885. Epub 2007 Aug 14. PMID: 17703421).

<sup>d</sup>Individuals with a short antiviral therapy (AZT (zidovudine) and DDI (didanosine) for V10 patient and AZT for I14 patient).

<sup>e</sup>The Modern Individuals have been infected within 3 years.

<sup>f</sup>N.A.:Not applicable.

<sup>g</sup>HIV RNA copies/mL

<sup>\*</sup>Envs isolated from the same patient are indicated by brackets.

<sup>“</sup>: same value than above.



**Table 2. Molecular characteristics of HIV-1 Envs: sequence length and N potential glycosylation sites (PNGs) in the variable loops (Vn) of the gp120 subunit.**

| Clinical Group      | Subgroup   | Env code | <sup>a</sup> V1/G | V2/G | V3/G | V4/G   | V5/G | <sup>b</sup> ΣVn/G | <sup>c</sup> Mean/G | <sup>d</sup> Gp160 | <sup>e</sup> Mean |     |  |
|---------------------|------------|----------|-------------------|------|------|--------|------|--------------------|---------------------|--------------------|-------------------|-----|--|
| LTNP                | EC         | 1        | 28/4              | 43/2 | 37/2 | 28/4   | 12/1 | 148/13             |                     | 848                |                   |     |  |
|                     |            | 2        | 33/5              | 41/2 | 37/2 | 31/4   | 12/1 | 154/14             |                     | 853                |                   |     |  |
|                     |            | 3        | 33/5              | 41/2 | 37/2 | 31/3   | 12/2 | 154/14             |                     | 853                |                   |     |  |
|                     |            | 6        | 28/3              | 41/2 | 37/2 | 34/4   | 12/1 | 152/12             |                     | 852                |                   |     |  |
|                     |            | 7        | 32/5              | 47/2 | 37/2 | 30/4   | 11/2 | 157/15             | 151.1/14.4          | 859                | 851.8             |     |  |
|                     |            | 8        | 32/5              | 47/2 | 37/2 | 30/4   | 11/2 | 157/15             |                     | 859                |                   |     |  |
|                     |            | 9        | 24/4              | 43/2 | 36/2 | 28/4   | 12/1 | 143/14             |                     | 843                |                   |     |  |
|                     |            | 10       | 27/4              | 42/2 | 37/2 | 29/5   | 14/2 | 149/16             |                     | 851                |                   |     |  |
|                     |            | 11       | 27/5              | 42/3 | 37/2 | 29/5   | 13/2 | 148/17             |                     | 850                |                   |     |  |
|                     |            | 12       | 27/4              | 42/3 | 37/2 | 32/5   | 12/1 | 150/14             |                     | 850                |                   |     |  |
|                     |            | Viremic  | 13                | 31/5 | 41/2 | 37/2   | 31/4 | 13/1               | 153/14              |                    | 854               |     |  |
|                     |            |          | 14                | 29/4 | 42/2 | 37/2   | 32/5 | 12/2               | 152/15              |                    | 852               |     |  |
|                     | 15         |          | 34/5              | 41/2 | 37/2 | 36/5   | 12/1 | 160/15             |                     | 860                |                   |     |  |
|                     | 16         |          | 29/5              | 41/2 | 37/1 | 29/5   | 12/1 | 148/14             |                     | 849                |                   |     |  |
|                     | 17         |          | 29/5              | 41/2 | 37/2 | 29/5   | 12/1 | 148/16             | 150,3/14.1          | 849                | 851.5             |     |  |
|                     | 18         |          | 29/4              | 41/2 | 37/2 | 29/5   | 12/1 | 148/15             |                     | 849                |                   |     |  |
|                     | 19         |          | 29/4              | 41/2 | 37/2 | 29/5   | 12/1 | 148/14             |                     | 849                |                   |     |  |
|                     | 21         |          | 24/3              | 41/2 | 37/1 | 30/5   | 10/0 | 142/11             |                     | 842                |                   |     |  |
|                     | 22         |          | 28/4              | 41/2 | 37/2 | 32/5   | 12/1 | 150/14             |                     | 850                |                   |     |  |
|                     | 24         |          | 37/7              | 41/2 | 36/2 | 32/5   | 12/1 | 158/15             |                     | 861                |                   |     |  |
|                     | Progressor |          | Old               | 26   | 31/4 | 41/3   | 37/2 | 39/7               | 14/2                | 160/18             |                   | 862 |  |
|                     |            |          |                   | 27   | 31/5 | 48/3   | 37/2 | 28/5               | 14/2                | 158/16             |                   | 858 |  |
|                     |            | 28       |                   | 25/5 | 41/2 | 36/2   | 33/5 | 12/2               | 145/15              |                    | 848               |     |  |
|                     |            | 30       |                   | 33/4 | 41/2 | 37/2   | 27/4 | 11/1               | 150/14              |                    | 852               |     |  |
| 31                  |            | 33/5     |                   | 41/2 | 37/2 | 36/5   | 13/2 | 158/16             |                     | 860                |                   |     |  |
| 32                  |            | 28/5     |                   | 44/2 | 36/2 | 30/5   | 15/2 | 151/15             | 153,8/15.2          | 853                | 855.8             |     |  |
| 33                  |            | 31/4     |                   | 44/2 | 36/2 | 30/5   | 15/2 | 156/14             |                     | 856                |                   |     |  |
| 36                  |            | 28/4     |                   | 46/1 | 37/2 | 34/5   | 14/2 | 157/15             |                     | 859                |                   |     |  |
| 37                  |            | 28/4     |                   | 46/2 | 37/2 | 34/5   | 14/2 | 157/16             |                     | 859                |                   |     |  |
| 38                  |            | 30/4     |                   | 41/3 | 37/1 | 31/4   | 13/2 | 150/13             |                     | 851                |                   |     |  |
| Modern <sup>e</sup> |            | 39       | 31/4              | 41/2 | 37/2 | 29/4   | 12/2 | 149/14             |                     | 849                |                   |     |  |
|                     |            | 40       | 31/4              | 41/2 | 37   | 29/4   | 17/2 | 154/14             |                     | 849                |                   |     |  |
|                     |            | 42       | 29/4              | 48/2 | 37   | 36/6   | 17/2 | 167/13             |                     | 878                |                   |     |  |
|                     |            | 43       | 29/4              | 48/3 | 37   | 30/4   | 15/2 | 159/15             |                     | 872                |                   |     |  |
|                     |            | 44       | 28/4              | 47/3 | 37   | 31/4   | 15/2 | 158/15             | 158.1/14.7          | 859                | 862.0             |     |  |
|                     |            | 45       | 28/4              | 47/2 | 37   | 31/4   | 15/2 | 158/14             |                     | 859                |                   |     |  |
|                     |            | 46       | 35/4              | 46/3 | 37   | 33/5   | 13/2 | 164/15             |                     | 865                |                   |     |  |
|                     |            | 49       | 37/6              | 41/2 | 37   | 42/7   | 13/1 | 170/18             |                     | 871                |                   |     |  |
|                     |            | 50       | 37/6              | 41/2 | 37   | 42/7   | 13/1 | 170/18             |                     | 871                |                   |     |  |
|                     |            | 51       | 31/4              | 42/2 | 37   | 26/3   | 13/1 | 149/12             |                     | 853                |                   |     |  |
| 52                  | 29/4       | 42/2     | 37                | 32/6 | 12/1 | 152/15 |      | 856                |                     |                    |                   |     |  |



<sup>a</sup> Length in amino acid (aa) and potential glycosylation sites (PNGs) of the Env-gp120 variable regions (Vn; from V1 to V5) expressed as Vn/G ratio.

<sup>b</sup>  $\Sigma Vn/G$  indicates the sum of the aa lengths of the Vn (n; from 1 to 5) and the potential G sites.

<sup>c</sup> Mean/G indicates the mean length and PNG value for each group of Envs.

<sup>d</sup> Gp160 shows the total length in aa of each Env including the gp41 subunit and the gp120 subunit.

<sup>e</sup> Mean gp160 length in aa for each group of Envs.

**A**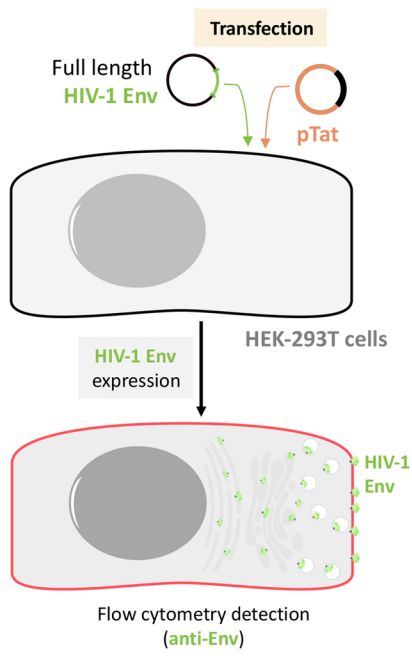**C**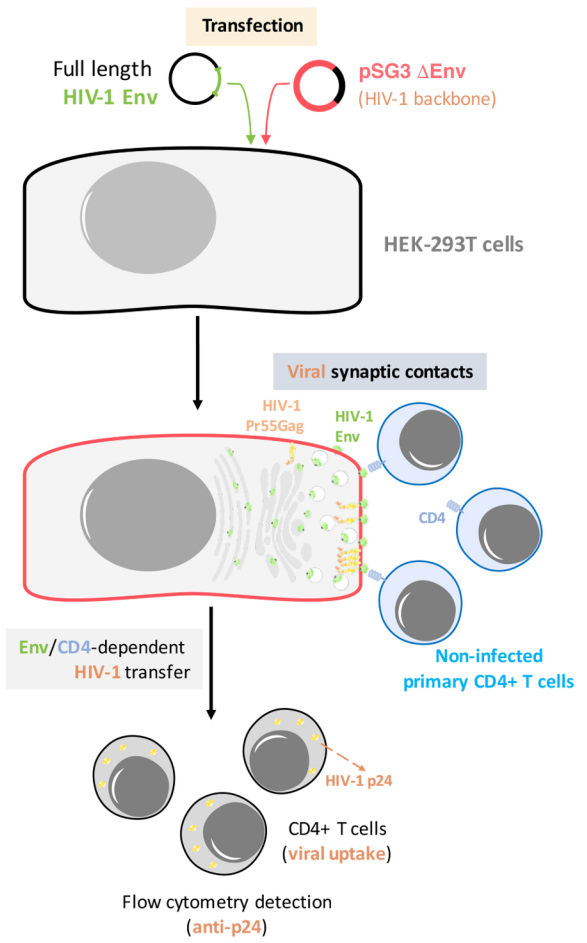**B**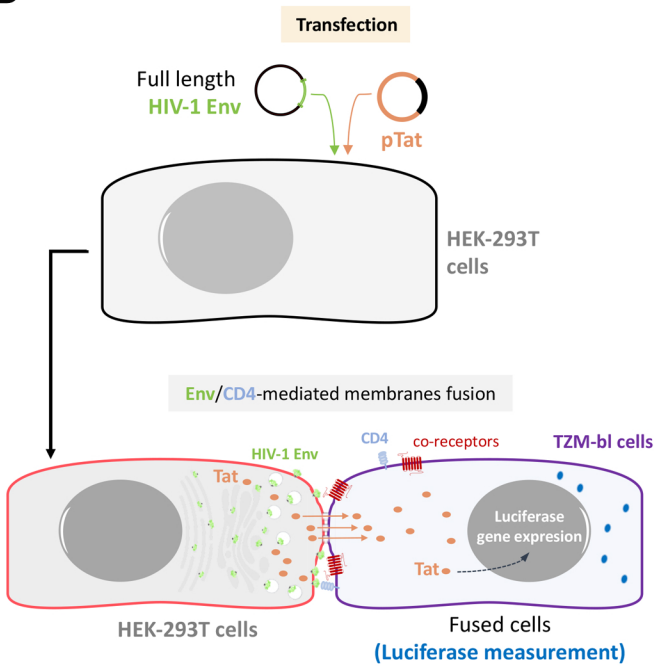**D**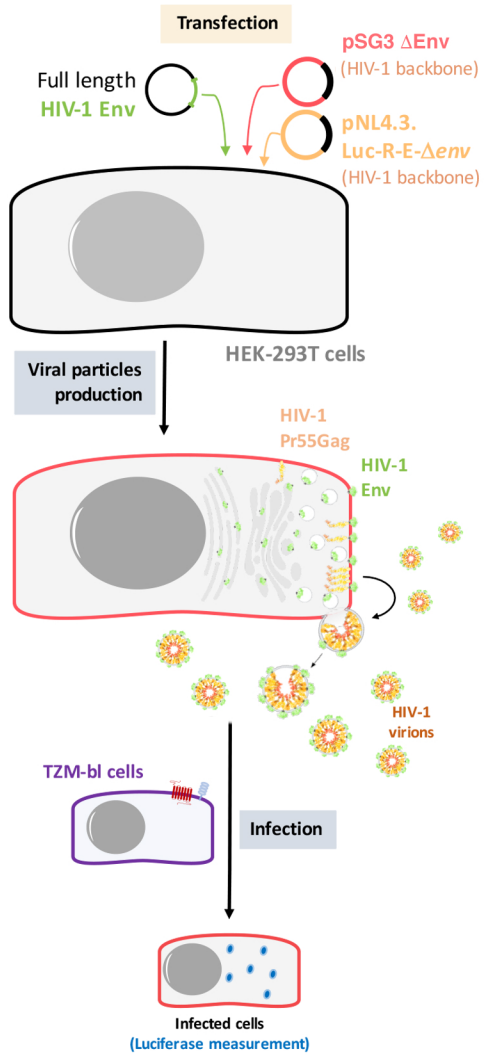

**Figure 1**  
 Silvia Pérez-Yanes *et al.*

**A**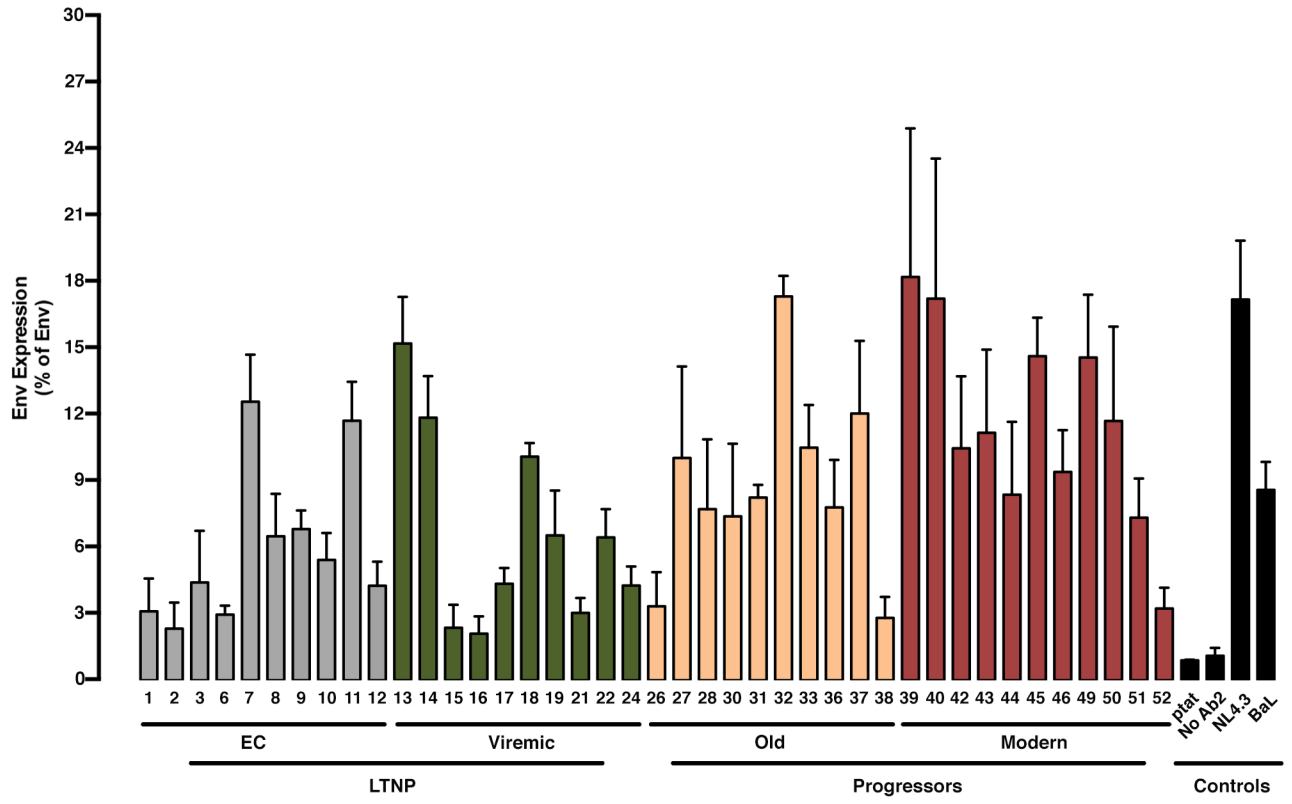**B**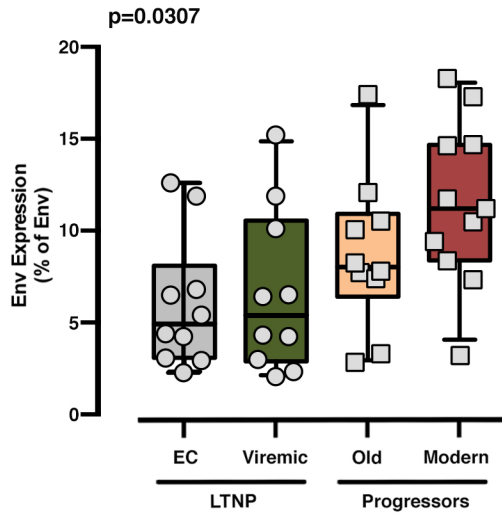

**A**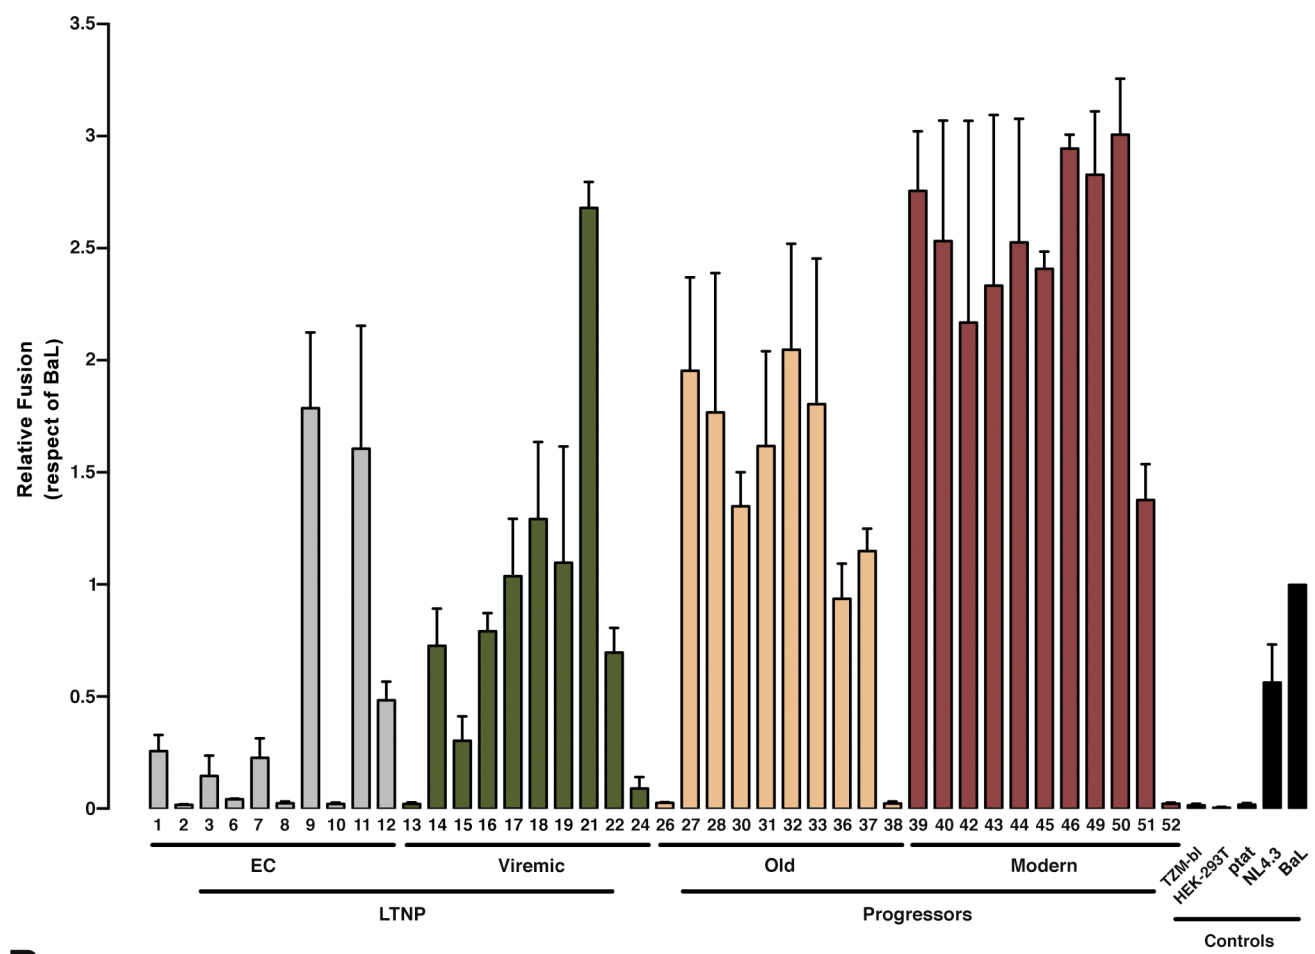**B**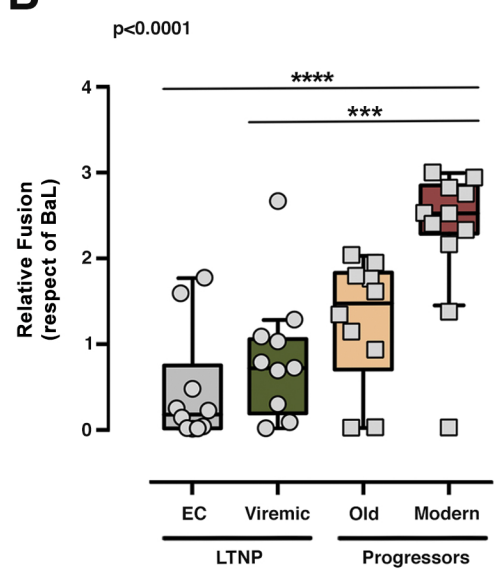

Figure 3  
 Sílvia Pérez-Yanes *et al.*

**A**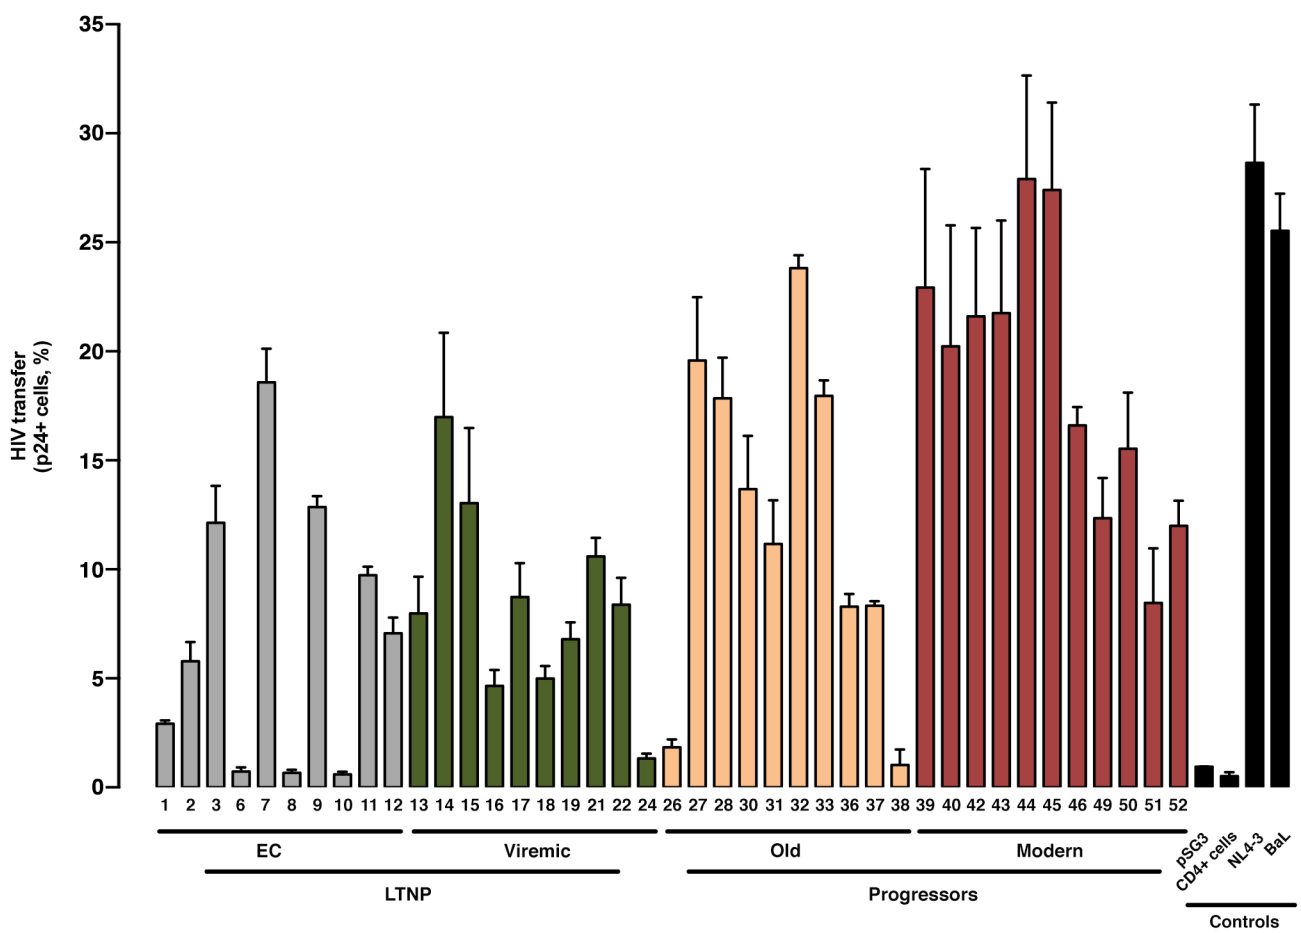**B**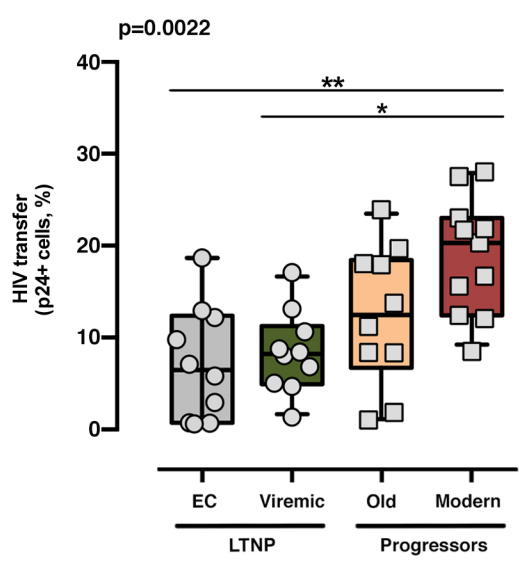

Figure 4  
Silvia Pérez-Yanes *et al.*

**A**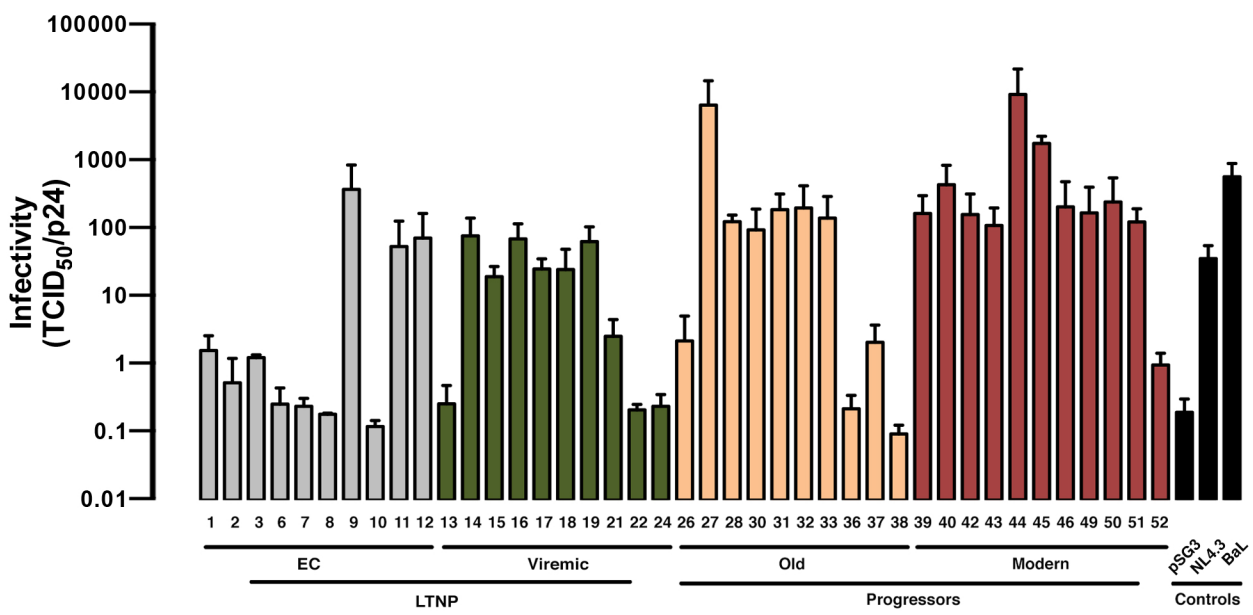**B**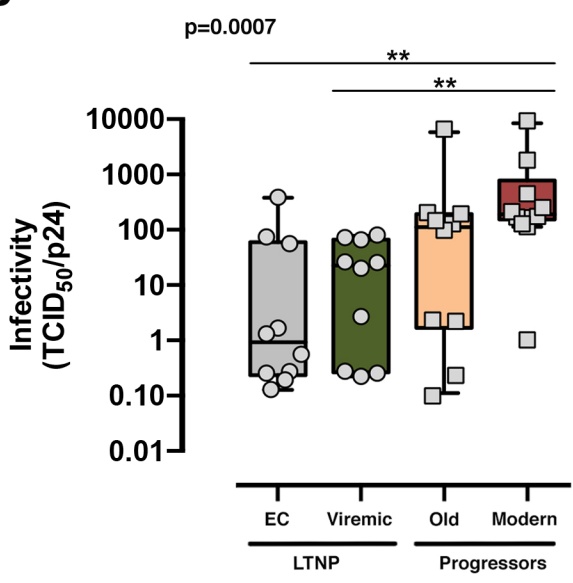

Figure 5  
Silvia Pérez-Yanes *et al.*

**A**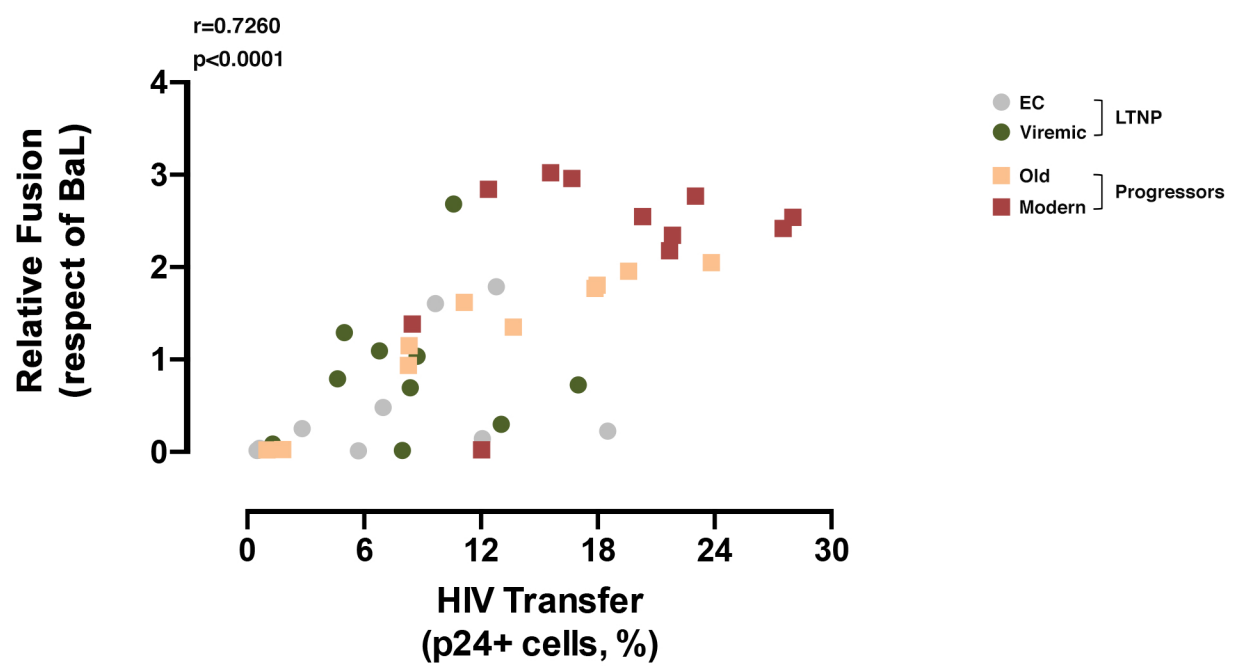**B**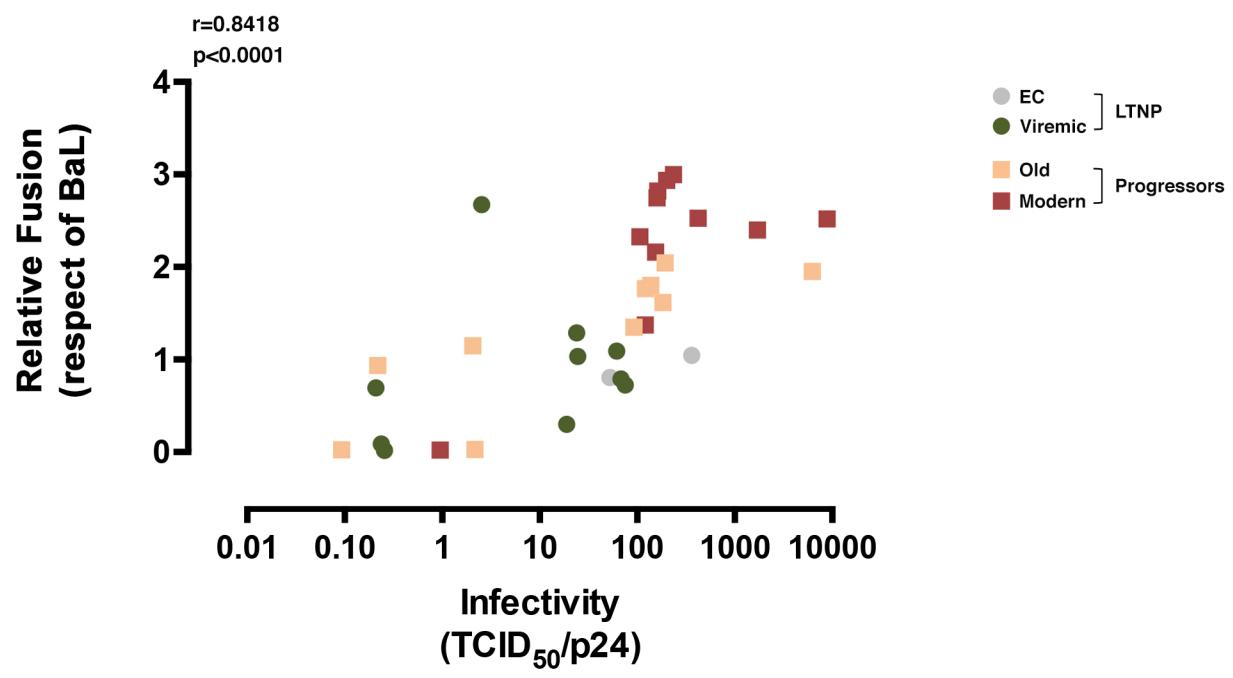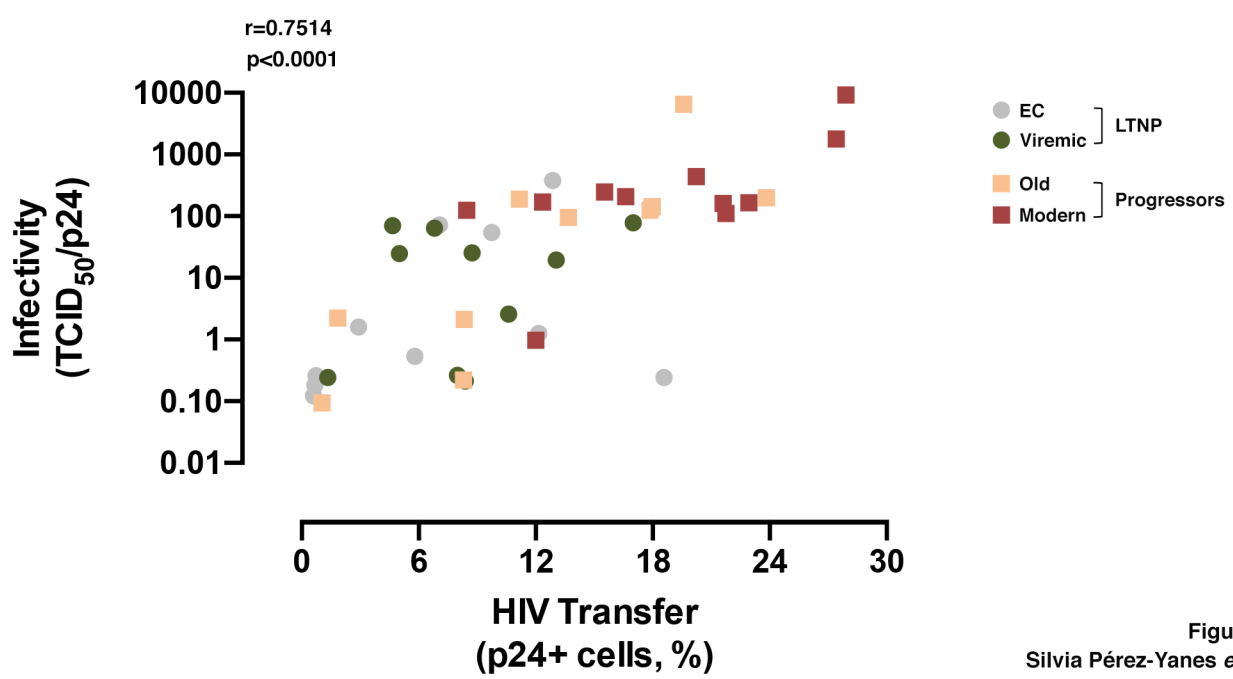

Figure 6  
Silvia Pérez-Yanes *et al.*

A

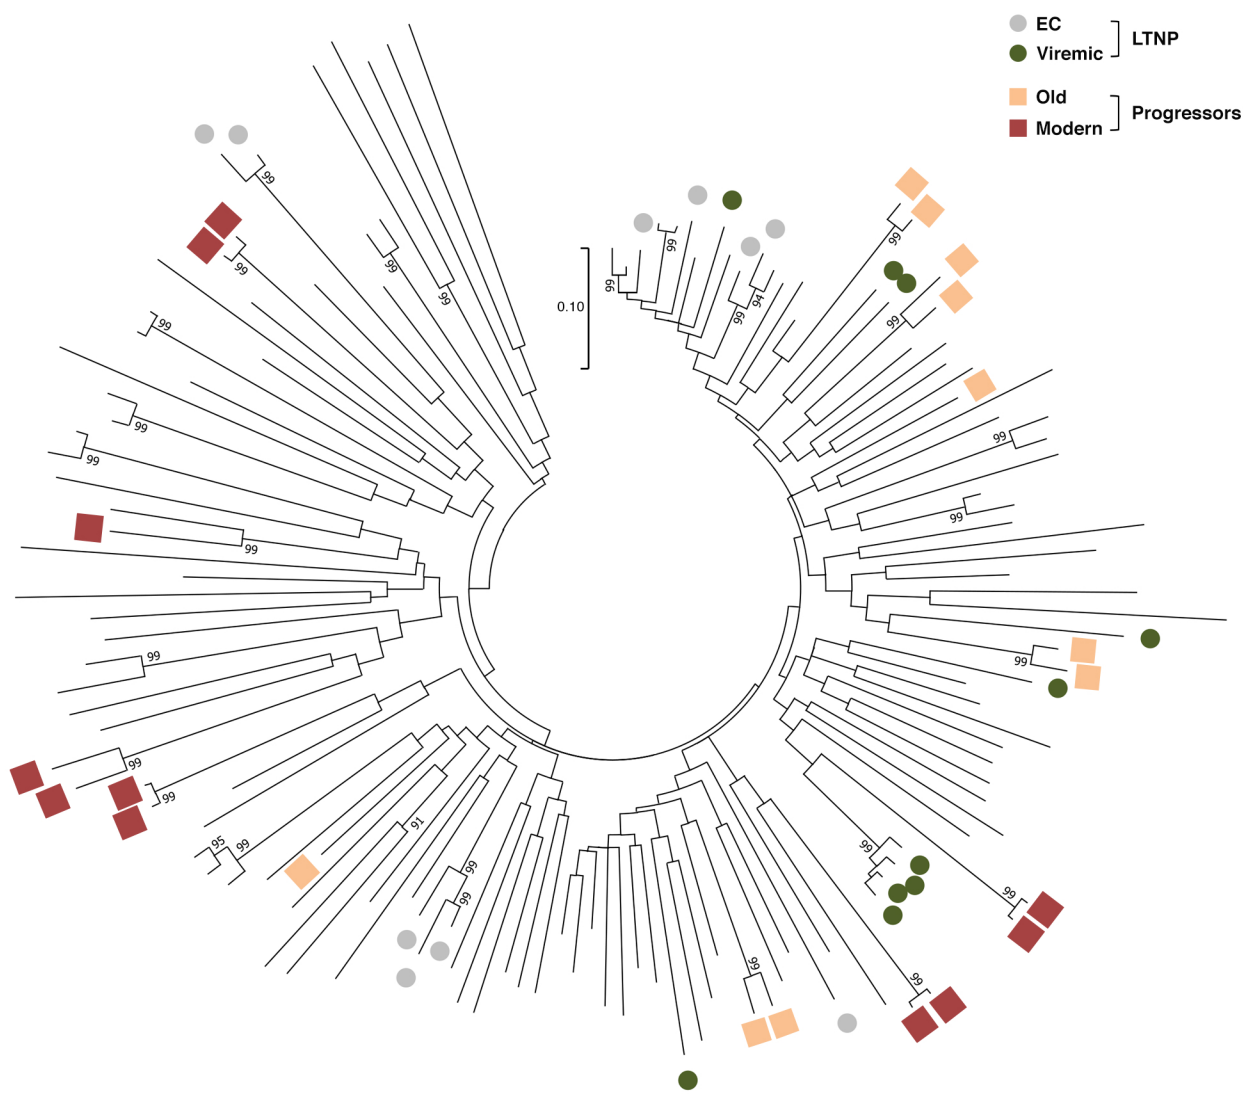

Figure 7  
Silvia Pérez-Yanes *et al.*



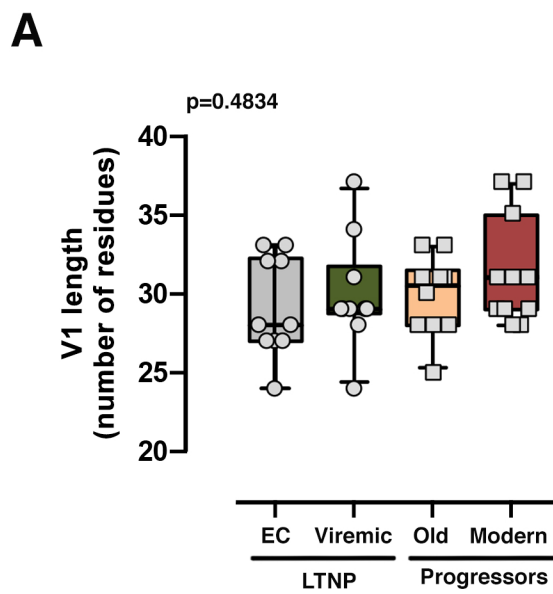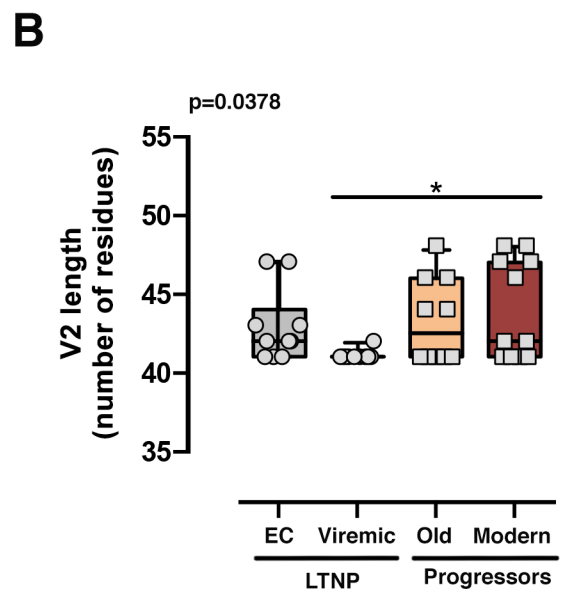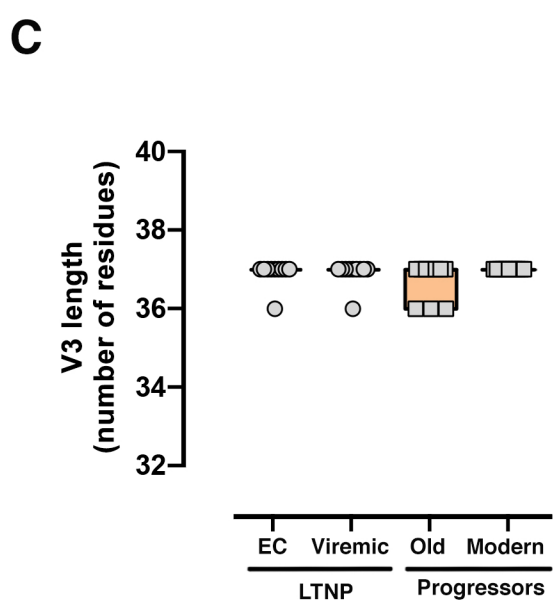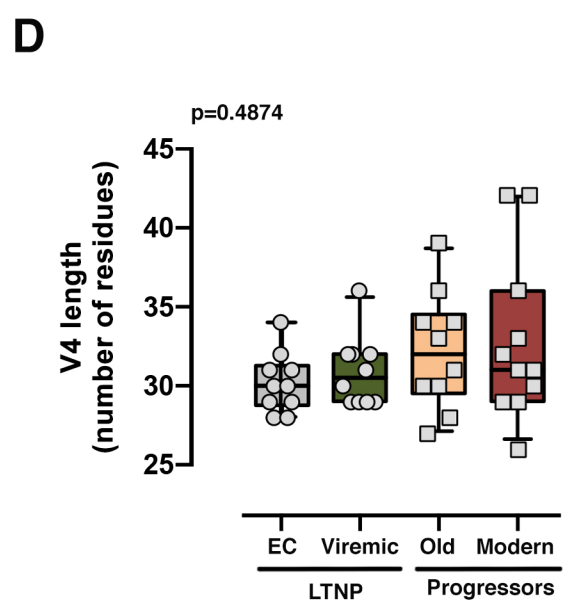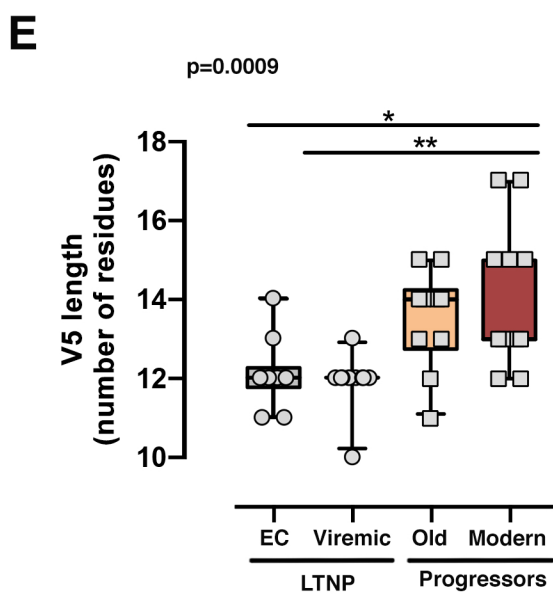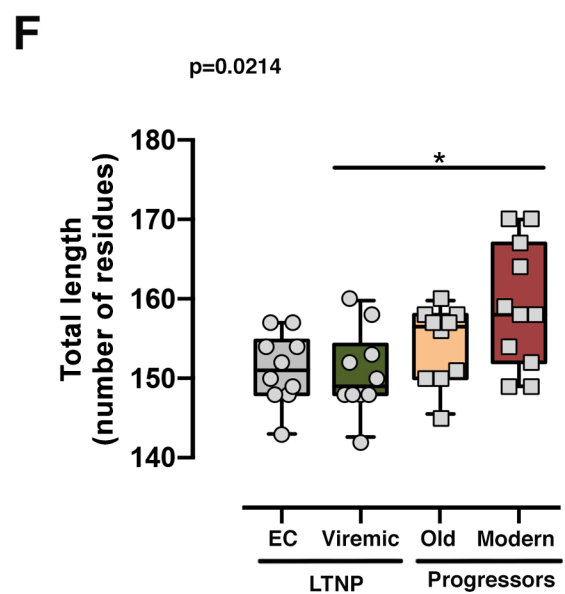

Figure 8  
Silvia Pérez-Yanes *et al.*

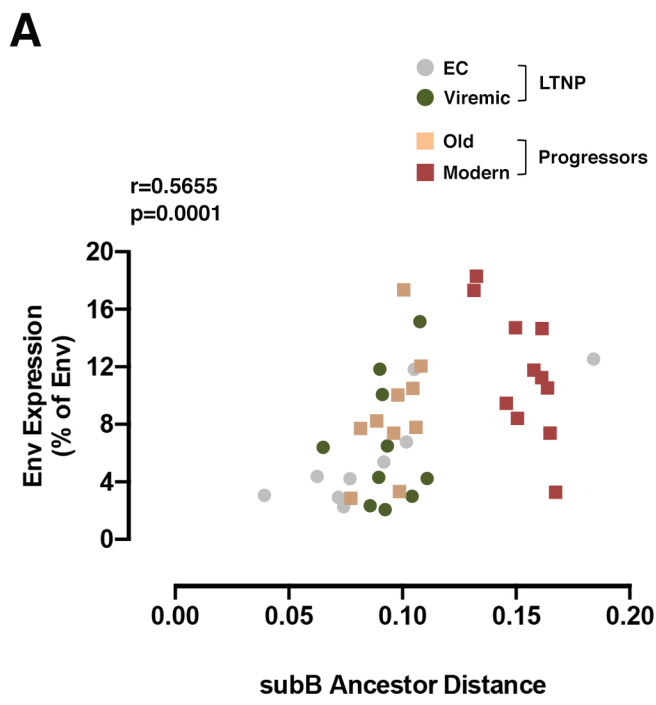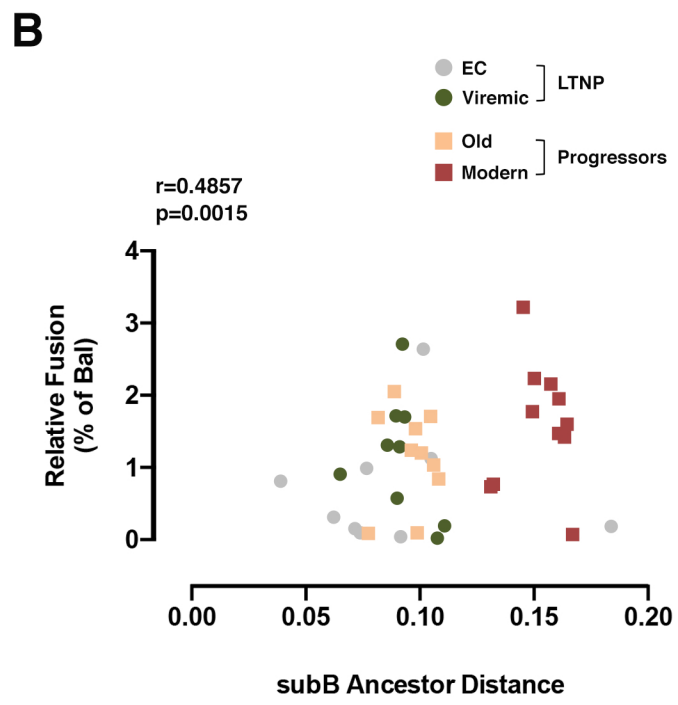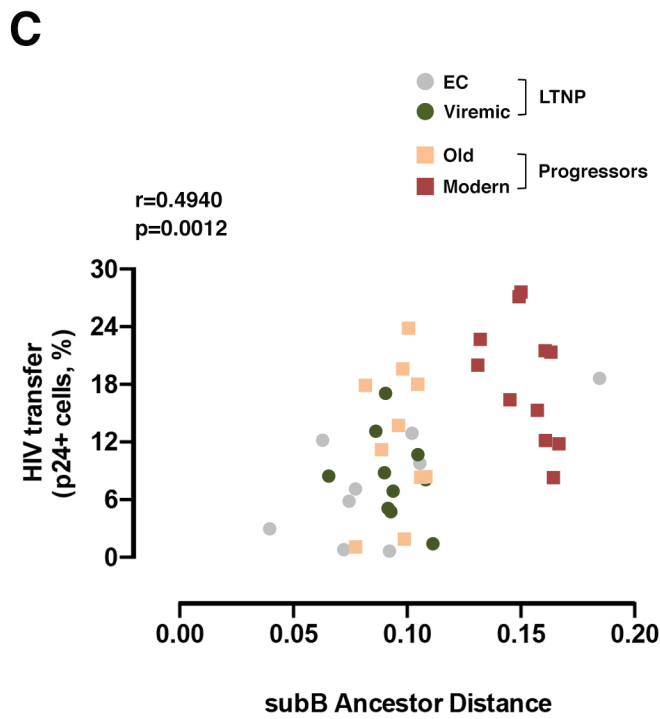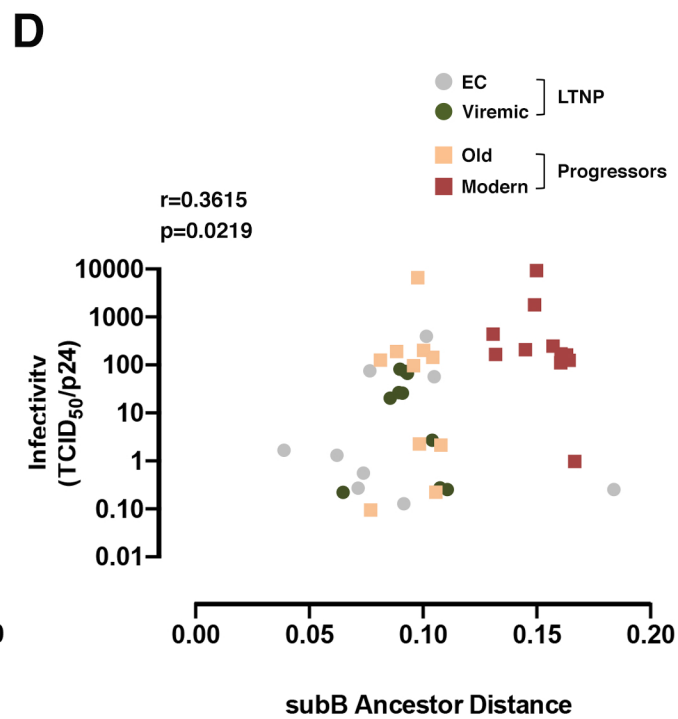

Source: https://www.biorxiv.org/content/10.1101/2021.07.07.451566v1.full.pdf
